# Supplementary material for: Theoretical mechanism for selective catalysis of double hydrophosphination of terminal arylacetylenes by an iron complex
Source: Royal Society of Chemistry journal article supplement (doi:10.1039/c3dt52941j), 2013-12-05
Supplement: c3dt52941j.pdf [file c3dt52941j.pdf]

## *Supplementary Information*

# **Theoretical Mechanism for selective catalysis of Double Hydrophosphination of Terminal Arylacetylenes by an Iron Complex**

**Mingshu Liu, Chuanzhi Sun\*, Fang Hang, Nan Sun and Dezhan Chen\***

*College of Chemistry, Chemical Engineering and Materials Science, Shandong Normal University, Jinan 250014, P. R. China*

## Full Gaussian 09 Reference

Gaussian 09, Revision B.01, M. J. Frisch, G. W. Trucks, H. B. Schlegel, G. E. Scuseria, M. A. Robb, J. R. Cheeseman, G. Scalmani, V. Barone, B. Mennucci, G. A. Petersson, H. Nakatsuji, M. Caricato, X. Li, H. P. Hratchian, A. F. Izmaylov, J. Bloino, G. Zheng, J. L. Sonnenberg, M. Hada, M. Ehara, K. Toyota, R. Fukuda, J. Hasegawa, M. Ishida, T. Nakajima, Y. Honda, O. Kitao, H. Nakai, T. Vreven, J. A. Montgomery, Jr., J. E. Peralta, F. Ogliaro, M. Bearpark, J. J. Heyd, E. Brothers, K. N. Kudin, V. N. Staroverov, R. Kobayashi, J. Normand, K. Raghavachari, A. Rendell, J. C. Burant, S. S. Iyengar, J. Tomasi, M. Cossi, N. Rega, J. M. Millam, M. Klene, J. E. Knox, J. B. Cross, V. Bakken, C. Adamo, J. Jaramillo, R. Gomperts, R. E. Stratmann, O. Yazyev, A. J. Austin, R. Cammi, C. Pomelli, J. W. Ochterski, R. L. Martin, K. Morokuma, V. G. Zakrzewski, G. A. Voth, P. Salvador, J. J. Dannenberg, S. Dapprich, A. D. Daniels, Ö. Farkas, J. B. Foresman, J. V. Ortiz, J. Cioslowski, and D. J. Fox, Gaussian, Inc., Wallingford, CT, 2010.

## Cartesian coordinates of all structures:

All calculations were carried out using DFT as implemented in Gaussian 09. We chose to use the popular B3LYP functional, which includes Becke's three-parameter hybrid functional combined with the Lee–Yang–Parr correction for correlation. The standard 6-31G(d,p) basis set are used for H, C, O, and P atoms, while the effective core potentials (ECPs) of Hay and Wadt are combined with double- $\zeta$  valence basis sets (LanL2DZ) for Fe. Frequencies were analyzed at the same level to characterize the nature of stationary points (energy minima or first order saddle points) and to provide thermodynamic quantities. The intrinsic reaction coordinate (IRC) paths were also traced to verify the profiles that connect each transition state to correct associated local minima.

Solvent effect was calculated by using self-consistent reaction field (SCRF) method based on the integral equation formalism polarizable continuum model (IEFPCM) model at M06/[LANL2DZ+6-311++G (d, p)] level of theory. Phenylacetylene was chosen as the solvent. For all cited energies, ZPE corrections were taken into consideration. The energies showed in the whole text were all calculated in this level.

**Figure S1** Optimized structures of **Int4<sup>‡</sup>**, **TS3<sup>‡</sup>** and **Int5-2**. Bond lengths are in angstroms.

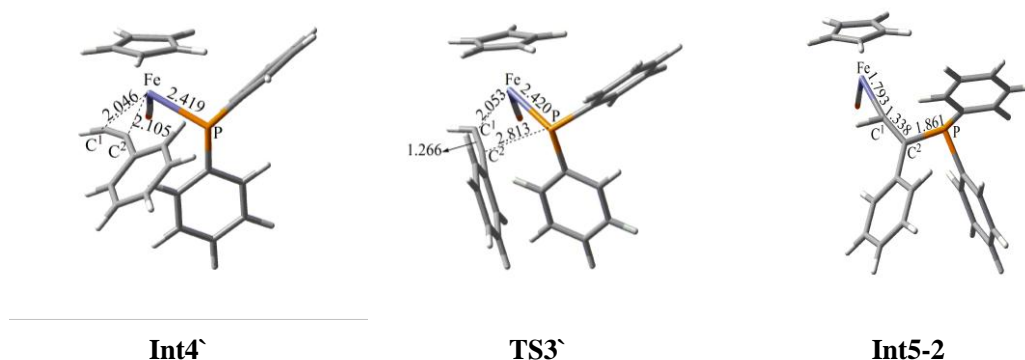

**Table 1.** Atom coordinates and absolute energy of **Cat-pre** (Energy= -583.389259043 a.u.)

| Atom | Coordinates (Angstroms) |             |             |
|------|-------------------------|-------------|-------------|
|      | X                       | Y           | Z           |
| Fe   | -0.11450300             | -0.00009600 | 0.04944400  |
| C    | -0.95279400             | -0.00050800 | 1.91135300  |
| H    | -0.60721000             | -0.89401100 | 2.43873100  |
| H    | -0.60771200             | 0.89328900  | 2.43860700  |
| H    | -2.04598600             | -0.00061800 | 1.90505100  |
| C    | -1.22894700             | 1.30078000  | -0.34831200 |
| C    | -1.22994700             | -1.29989700 | -0.34884100 |
| O    | -1.94899800             | 2.16956900  | -0.58895200 |
| O    | -1.95088700             | -2.16789200 | -0.58972500 |
| C    | 1.54055000              | 0.70590100  | -1.14854200 |
| C    | 1.54024000              | -0.70658400 | -1.14851100 |
| C    | 1.69390400              | -1.15183300 | 0.20958300  |
| C    | 1.81224200              | -0.00033900 | 1.03070100  |
| C    | 1.69431000              | 1.15115600  | 0.20954600  |
| H    | 1.42128800              | 1.34127500  | -2.01535000 |
| H    | 1.42092200              | -1.34191300 | -2.01534100 |
| H    | 1.73540100              | -2.17965900 | 0.54156900  |
| H    | 1.90553900              | -0.00031800 | 2.10734000  |
| H    | 1.73657900              | 2.17899800  | 0.54138700  |

**Table 2.** Atom coordinates and absolute energy of **TS** (Energy= -583.364857172 a.u.)

| Atom | Coordinates (Angstroms) |             |            |
|------|-------------------------|-------------|------------|
|      | X                       | Y           | Z          |
| Fe   | -0.03431300             | 0.07184000  | 0.12350100 |
| C    | -1.69339800             | -0.86881400 | 1.32441700 |

|   |             |             |             |
|---|-------------|-------------|-------------|
| H | -1.73041700 | -1.93856300 | 1.52727400  |
| H | -0.94854900 | -0.41056400 | 1.99411400  |
| H | -2.65137900 | -0.38939600 | 1.52492500  |
| C | -0.77158000 | 1.67233500  | 0.01447300  |
| C | -1.52271600 | -0.77816700 | -0.34675800 |
| O | -1.20467800 | 2.73878700  | -0.09217600 |
| O | -2.31627400 | -1.29385100 | -1.06643300 |
| C | 1.70233200  | 0.60059200  | -0.93598700 |
| C | 1.36206000  | -0.74425400 | -1.23932100 |
| C | 1.40107100  | -1.48430100 | -0.02121700 |
| C | 1.84018500  | -0.60114700 | 1.02069800  |
| C | 2.03391600  | 0.67824100  | 0.46794200  |
| H | 1.75018900  | 1.41679800  | -1.64349000 |
| H | 1.05427000  | -1.11922800 | -2.20507800 |
| H | 1.17747900  | -2.53635300 | 0.09103500  |
| H | 1.95332400  | -0.86419800 | 2.06441900  |
| H | 2.34360800  | 1.56725900  | 0.99916500  |

**Table 3.** Atom coordinates and absolute energy of **Fe-Cat** (Energy= -583.36497749 a.u.)

---

| Atom | Coordinates (Angstroms) |             |             |
|------|-------------------------|-------------|-------------|
|      | X                       | Y           | Z           |
| Fe   | -0.02891700             | 0.07743000  | 0.14575700  |
| C    | -1.72668600             | -0.88168400 | 1.29828300  |
| H    | -1.75350100             | -1.94481400 | 1.53649800  |
| H    | -0.95581400             | -0.40556100 | 1.93551800  |
| H    | -2.67386400             | -0.39410300 | 1.53084700  |
| C    | -0.76602100             | 1.67674900  | 0.02102200  |
| C    | -1.53383100             | -0.77962600 | -0.31782800 |
| O    | -1.19753600             | 2.74269500  | -0.09801900 |
| O    | -2.29271200             | -1.28115900 | -1.09025000 |
| C    | 1.67820300              | 0.57278000  | -0.97097700 |
| C    | 1.33037800              | -0.78007700 | -1.22887900 |
| C    | 1.40035200              | -1.48617700 | 0.00703300  |
| C    | 1.86750400              | -0.57534700 | 1.01346100  |
| C    | 2.04893600              | 0.68748900  | 0.42074700  |
| H    | 1.70877600              | 1.36906500  | -1.70174800 |
| H    | 0.99416100              | -1.18008800 | -2.17491100 |
| H    | 1.17917100              | -2.53463300 | 0.15345400  |
| H    | 2.00933000              | -0.81034900 | 2.06035200  |
| H    | 2.37256500              | 1.59037300  | 0.91927900  |

---

**Table 4.** Atom coordinates and absolute energy of **Ph<sub>2</sub>PH** (Energy= -804.977286433 a.u.)

---

| Coordinates (Angstroms) |             |             |             |
|-------------------------|-------------|-------------|-------------|
| Atom                    | X           | Y           | Z           |
| P                       | -0.04823900 | 1.66400600  | -0.30351900 |
| H                       | 0.01884600  | 1.72128200  | -1.72458100 |
| C                       | -1.45897500 | 0.46327100  | -0.15260300 |
| C                       | -2.64161500 | 0.92922100  | 0.43864500  |
| C                       | -1.40531800 | -0.86691500 | -0.59670500 |
| C                       | -3.75195100 | 0.09192700  | 0.57152900  |
| H                       | -2.69196300 | 1.95341000  | 0.79868200  |
| C                       | -2.51060900 | -1.70514500 | -0.45900600 |
| H                       | -0.49237000 | -1.24947100 | -1.04353600 |
| C                       | -3.68752000 | -1.22660200 | 0.12320900  |
| H                       | -4.66157600 | 0.46896100  | 1.03028700  |
| H                       | -2.45507000 | -2.73299500 | -0.80669500 |
| H                       | -4.54744600 | -1.88166000 | 0.22980600  |
| C                       | 1.43345300  | 0.58378100  | -0.07796700 |
| C                       | 2.22504100  | 0.14530900  | -1.15088100 |
| C                       | 1.82304600  | 0.23672700  | 1.22670600  |
| C                       | 3.37021200  | -0.62176000 | -0.92643900 |
| H                       | 1.94654900  | 0.40390700  | -2.16876700 |
| C                       | 2.95733400  | -0.54155300 | 1.45021600  |
| H                       | 1.23356900  | 0.57928100  | 2.07343500  |
| C                       | 3.73642900  | -0.97092700 | 0.37334500  |
| H                       | 3.97178300  | -0.95050300 | -1.76924400 |
| H                       | 3.23911600  | -0.80566700 | 2.46552800  |
| H                       | 4.62498900  | -1.57064400 | 0.54757000  |

**Table 5.** Atom coordinates and absolute energy of **HC(O)Me** (Energy= -153.778476165 a.u.)

---

| Coordinates (Angstroms) |             |             |             |
|-------------------------|-------------|-------------|-------------|
| Atom                    | X           | Y           | Z           |
| C                       | 0.23931000  | 0.41240800  | 0.00000000  |
| O                       | 1.22753900  | -0.28704100 | 0.00000000  |
| H                       | 0.33231000  | 1.52200900  | 0.00000000  |
| C                       | -1.17247000 | -0.13623400 | -0.00000100 |
| H                       | -1.92181000 | 0.65870500  | -0.00008200 |
| H                       | -1.31589800 | -0.77078600 | -0.88092600 |
| H                       | -1.31595200 | -0.77064900 | 0.88101500  |

**Table 6.** Atom coordinates and absolute energy of **PhC≡CH** (Energy= -308.22490703 a.u.)

| Atom | Coordinates (Angstroms) |             |             |
|------|-------------------------|-------------|-------------|
|      | X                       | Y           | Z           |
| C    | -1.51237000             | -1.20835000 | 0.00000000  |
| C    | -0.12004200             | -1.21307100 | 0.00000000  |
| C    | 0.59398900              | -0.00001000 | -0.00000200 |
| C    | -0.12003300             | 1.21306600  | -0.00000100 |
| C    | -1.51235500             | 1.20836000  | 0.00000100  |
| C    | -2.21265000             | 0.00000600  | 0.00000000  |
| H    | -2.05267000             | -2.15039800 | 0.00000100  |
| H    | 0.42817800              | -2.14941500 | 0.00000000  |
| H    | 0.42820700              | 2.14939900  | -0.00000100 |
| H    | -2.05265300             | 2.15040900  | 0.00000100  |
| H    | -3.29857600             | 0.00001600  | 0.00000100  |
| C    | 2.02394100              | -0.00000600 | -0.00000100 |
| C    | 3.23419400              | 0.00000100  | 0.00000200  |
| H    | 4.29946500              | 0.00001300  | 0.00000400  |

**Table 7.** Atom coordinates and absolute energy of **Int1** (Energy= -1388.39845082 a.u.)

| Atom | Coordinates (Angstroms) |             |             |
|------|-------------------------|-------------|-------------|
|      | X                       | Y           | Z           |
| Fe   | -1.54718200             | -0.39247500 | 0.17852800  |
| P    | 0.48803800              | 0.00533800  | -0.67053900 |
| H    | 0.52228000              | 0.04338500  | -2.07917900 |
| C    | 1.25895700              | 1.63593400  | -0.27653900 |
| C    | 2.31060900              | 1.75032300  | 0.64284700  |
| C    | 0.73074100              | 2.79614700  | -0.86736800 |
| C    | 2.83156800              | 3.00612900  | 0.96468500  |
| H    | 2.73513200              | 0.86177900  | 1.10015200  |
| C    | 1.26102300              | 4.04585900  | -0.54679800 |
| H    | -0.09923700             | 2.70677200  | -1.56165800 |
| C    | 2.31026700              | 4.15516500  | 0.36987200  |
| H    | 3.64840900              | 3.08242900  | 1.67695800  |
| H    | 0.85204400              | 4.93712500  | -1.01457400 |
| H    | 2.71887500              | 5.13069500  | 0.61777500  |
| C    | 1.83586900              | -1.20842500 | -0.35459700 |
| C    | 2.97260900              | -1.24733600 | -1.17923700 |
| C    | 1.73666100              | -2.11619300 | 0.70829800  |
| C    | 3.98565300              | -2.17541700 | -0.94405100 |
| H    | 3.06537800              | -0.54945700 | -2.00716300 |
| C    | 2.75512300              | -3.04191200 | 0.94751900  |
| H    | 0.85344100              | -2.10293600 | 1.33943400  |

|   |             |             |             |
|---|-------------|-------------|-------------|
| C | 3.87883900  | -3.07342400 | 0.12168900  |
| H | 4.85686200  | -2.20003000 | -1.59234100 |
| H | 2.66539800  | -3.74186500 | 1.77327500  |
| H | 4.66795700  | -3.79751300 | 0.30308100  |
| C | -1.59978300 | -2.01814300 | -0.44770900 |
| O | -1.65460600 | -3.10972600 | -0.83896800 |
| C | -2.33510400 | 0.31194100  | -1.46221700 |
| O | -1.82989400 | 1.22466800  | -2.10405300 |
| C | -3.67277000 | -0.25331900 | -1.94758600 |
| H | -4.14525300 | 0.43259700  | -2.65806300 |
| H | -3.47840700 | -1.20744900 | -2.45322300 |
| H | -4.34689600 | -0.46757000 | -1.11408600 |
| C | -3.14212200 | -0.48994900 | 1.62017500  |
| C | -1.93296000 | -0.89181400 | 2.28185100  |
| C | -1.02861600 | 0.19038300  | 2.23067800  |
| C | -1.67098100 | 1.28095000  | 1.55246700  |
| C | -2.98260000 | 0.86392000  | 1.21048600  |
| H | -4.03088400 | -1.09409900 | 1.50167100  |
| H | -1.74347200 | -1.86533900 | 2.71359800  |
| H | -0.02176000 | 0.20139700  | 2.62534600  |
| H | -1.23663400 | 2.24952600  | 1.35275700  |
| H | -3.71896800 | 1.46037700  | 0.68999800  |

**Table 8.** Atom coordinates and absolute energy of **TS1** (Energy= -1388.34468949 a.u.)

---

| Atom | Coordinates (Angstroms) |             |             |
|------|-------------------------|-------------|-------------|
|      | X                       | Y           | Z           |
| Fe   | 1.87833200              | -0.05203400 | -0.21804800 |
| P    | -0.76202200             | 0.05040200  | -0.54586200 |
| H    | -0.09262700             | -0.04684200 | 0.71164700  |
| C    | -1.73523100             | 1.54757800  | -0.06886400 |
| C    | -2.48539200             | 2.22044300  | -1.04560000 |
| C    | -1.71308800             | 2.05572800  | 1.24103200  |
| C    | -3.21443300             | 3.36469000  | -0.71812800 |
| H    | -2.49810000             | 1.84926800  | -2.06731500 |
| C    | -2.42996600             | 3.20932200  | 1.56223900  |
| H    | -1.13509700             | 1.54509900  | 2.00622000  |
| C    | -3.18501800             | 3.86286600  | 0.58570300  |
| H    | -3.79604800             | 3.87199400  | -1.48274700 |
| H    | -2.40406500             | 3.59327400  | 2.57831100  |
| H    | -3.74542800             | 4.75825000  | 0.83916900  |
| C    | -1.87724700             | -1.39298000 | -0.26687900 |
| C    | -1.91787500             | -2.07700100 | 0.95959200  |

---

|   |             |             |             |
|---|-------------|-------------|-------------|
| C | -2.68669600 | -1.83842200 | -1.32335700 |
| C | -2.75849200 | -3.17943100 | 1.12075000  |
| H | -1.28630800 | -1.75097900 | 1.78057900  |
| C | -3.53816700 | -2.93045500 | -1.15305400 |
| H | -2.64713800 | -1.33250100 | -2.28465700 |
| C | -3.57375300 | -3.60383900 | 0.06939200  |
| H | -2.77932700 | -3.70418300 | 2.07185900  |
| H | -4.16354800 | -3.26182100 | -1.97724900 |
| H | -4.22953400 | -4.45998400 | 0.20007600  |
| C | 1.94651400  | -1.66092100 | -0.92899200 |
| O | 2.04902100  | -2.70073700 | -1.42548600 |
| C | 1.94882300  | -0.77959500 | 1.57760600  |
| O | 1.02902400  | -0.58273900 | 2.36521600  |
| C | 3.15536300  | -1.58725300 | 2.05192700  |
| H | 3.19373000  | -1.61711100 | 3.14543200  |
| H | 3.04455000  | -2.61239000 | 1.67630100  |
| H | 4.09270300  | -1.19904400 | 1.64540000  |
| C | 3.83435900  | 0.62506900  | -0.64867900 |
| C | 3.05337700  | 0.93376700  | -1.81932000 |
| C | 2.02652800  | 1.80900600  | -1.43473700 |
| C | 2.17142800  | 2.08698800  | -0.03005100 |
| C | 3.31961700  | 1.40209600  | 0.43395900  |
| H | 4.71393100  | -0.00309800 | -0.62159400 |
| H | 3.19706600  | 0.51082700  | -2.80429500 |
| H | 1.23115200  | 2.17465700  | -2.06874800 |
| H | 1.52749100  | 2.72580400  | 0.55869900  |
| H | 3.70204200  | 1.41750400  | 1.44501700  |

**Table 9.** Atom coordinates and absolute energy of **Int2** (Energy= -1388.35502147 a.u.)

---

| Atom | Coordinates (Angstroms) |             |             |
|------|-------------------------|-------------|-------------|
|      | X                       | Y           | Z           |
| Fe   | 1.76852700              | -0.07454100 | -0.21208700 |
| P    | -0.76735500             | 0.08708200  | -0.99732500 |
| H    | 0.13471100              | 0.02802000  | 0.17919300  |
| C    | -1.62854300             | 1.56181200  | -0.27147000 |
| C    | -2.49405400             | 2.28058600  | -1.11038700 |
| C    | -1.43987600             | 1.99741900  | 1.05117600  |
| C    | -3.17559100             | 3.40213200  | -0.63433300 |
| H    | -2.63381900             | 1.96391600  | -2.14124800 |
| C    | -2.11369000             | 3.12704100  | 1.51893300  |
| H    | -0.76577800             | 1.45256700  | 1.70709900  |
| C    | -2.98421500             | 3.82826900  | 0.68090000  |

---



|   |             |             |             |
|---|-------------|-------------|-------------|
| H | -3.84642400 | 3.94685400  | -1.29281800 |
| H | -1.96073400 | 3.45723800  | 2.54284600  |
| H | -3.50751900 | 4.70574600  | 1.05027900  |
| C | -1.78866000 | -1.34056300 | -0.40457700 |
| C | -1.92181500 | -1.70786800 | 0.94525700  |
| C | -2.47365800 | -2.07750700 | -1.38254300 |
| C | -2.72910400 | -2.78799200 | 1.30093800  |
| H | -1.38527800 | -1.15915400 | 1.71272400  |
| C | -3.28972400 | -3.15203100 | -1.02187800 |
| H | -2.36469400 | -1.81136700 | -2.43085600 |
| C | -3.41763200 | -3.50820900 | 0.32060000  |
| H | -2.82205300 | -3.06743900 | 2.34677100  |
| H | -3.81671800 | -3.71245000 | -1.78890600 |
| H | -4.04718700 | -4.34720600 | 0.60357200  |
| C | 1.82031800  | -1.73350500 | -0.80123600 |
| O | 1.91377600  | -2.80964400 | -1.21357400 |
| C | 1.66108700  | -0.66774000 | 1.64692700  |
| O | 0.79015400  | -0.25378500 | 2.39983900  |
| C | 2.71222200  | -1.62930100 | 2.19894500  |
| H | 2.71835200  | -1.60572900 | 3.29317400  |
| H | 2.45528100  | -2.64334700 | 1.86829000  |
| H | 3.70720500  | -1.40782100 | 1.80384900  |
| C | 3.80248900  | 0.45170100  | -0.50334600 |
| C | 3.12037600  | 0.75259600  | -1.73494000 |
| C | 2.13141200  | 1.71279800  | -1.45607000 |
| C | 2.20117700  | 2.04193700  | -0.05864100 |
| C | 3.26569000  | 1.30066400  | 0.50994100  |
| H | 4.63199600  | -0.23228900 | -0.38872500 |
| H | 3.30216700  | 0.28182800  | -2.69136200 |
| H | 1.41149400  | 2.10555900  | -2.16068500 |
| H | 1.56036100  | 2.74040500  | 0.46070100  |
| H | 3.57655300  | 1.33050000  | 1.54493100  |

**Table 10.** Atom coordinates and absolute energy of **TS2** (Energy= -1388.34850215a.u.)

---

| Atom | Coordinates (Angstroms) |             |             |
|------|-------------------------|-------------|-------------|
|      | X                       | Y           | Z           |
| Fe   | -1.56326600             | 0.05272700  | -0.11404700 |
| P    | 0.59314500              | -0.08975600 | 1.10543900  |
| H    | -0.69715600             | -1.07494500 | 0.34533000  |
| C    | 1.40502700              | 1.44648600  | 0.44311100  |
| C    | 1.09302300              | 2.65086800  | 1.10117500  |
| C    | 2.33796200              | 1.48333800  | -0.60598100 |

---

|   |             |             |             |
|---|-------------|-------------|-------------|
| C | 1.67713300  | 3.85441600  | 0.70911500  |
| H | 0.38801300  | 2.64209800  | 1.92858900  |
| C | 2.92989200  | 2.68824700  | -0.99210900 |
| H | 2.61672800  | 0.56549400  | -1.11387900 |
| C | 2.59875300  | 3.87786100  | -0.34154100 |
| H | 1.42220300  | 4.77234800  | 1.23162000  |
| H | 3.65116600  | 2.69515600  | -1.80494500 |
| H | 3.06013200  | 4.81361400  | -0.64357900 |
| C | 1.68683200  | -1.41928700 | 0.40602400  |
| C | 1.23347100  | -2.47191700 | -0.40410000 |
| C | 3.02963300  | -1.44071000 | 0.83211300  |
| C | 2.09303000  | -3.50718700 | -0.78290400 |
| H | 0.20040700  | -2.49465100 | -0.73721300 |
| C | 3.88923100  | -2.46568500 | 0.44296800  |
| H | 3.40447000  | -0.64711500 | 1.47332100  |
| C | 3.42341000  | -3.50529400 | -0.36706100 |
| H | 1.71738700  | -4.31208900 | -1.40862400 |
| H | 4.92251800  | -2.45718500 | 0.77885300  |
| H | 4.09226400  | -4.30716100 | -0.66607800 |
| C | -2.08846500 | 0.93712100  | 1.32168400  |
| O | -2.44889200 | 1.58582300  | 2.20695400  |
| C | -2.40612700 | -1.65842700 | 0.55760800  |
| O | -2.73720900 | -2.52505800 | -0.22418500 |
| C | -2.63965300 | -1.84951900 | 2.05167500  |
| H | -1.77453300 | -1.51337500 | 2.63081500  |
| H | -3.49743200 | -1.23965600 | 2.35811200  |
| H | -2.85739200 | -2.90028500 | 2.26344800  |
| C | -2.68668000 | 1.38317500  | -1.37284300 |
| C | -1.29545800 | 1.66104100  | -1.54964000 |
| C | -0.68721600 | 0.48001300  | -2.05182800 |
| C | -1.68907200 | -0.52233900 | -2.18558500 |
| C | -2.92913100 | 0.03821100  | -1.76871500 |
| H | -3.42774300 | 2.07378700  | -0.99292300 |
| H | -0.79153000 | 2.58565500  | -1.30927500 |
| H | 0.36567100  | 0.35463000  | -2.25744600 |
| H | -1.54043000 | -1.54399300 | -2.50095100 |
| H | -3.87178100 | -0.48547200 | -1.71268200 |

**Table 11.** Atom coordinates and absolute energy of **Int3** (Energy= -1234.58014913 a.u.)

---

| Coordinates (Angstroms) |             |             |             |
|-------------------------|-------------|-------------|-------------|
| Atom                    | X           | Y           | Z           |
| Fe                      | -1.78179300 | -0.44665900 | -0.01973300 |

---

|   |             |             |             |
|---|-------------|-------------|-------------|
| P | 0.26224400  | -0.01280300 | -0.02535700 |
| C | 1.68873700  | -1.15473500 | -0.02359800 |
| C | 1.62310900  | -2.35488900 | 0.70582300  |
| C | 2.84543700  | -0.89109400 | -0.78149800 |
| C | 2.67689600  | -3.26814300 | 0.67015400  |
| H | 0.74709900  | -2.56667800 | 1.31048300  |
| C | 3.89810100  | -1.80412000 | -0.81206100 |
| H | 2.91880000  | 0.03109700  | -1.34967200 |
| C | 3.81683600  | -2.99643800 | -0.08820100 |
| H | 2.60932400  | -4.18889000 | 1.24268100  |
| H | 4.78129600  | -1.58672500 | -1.40636900 |
| H | 4.63808800  | -3.70694900 | -0.11331600 |
| C | 1.01821900  | 1.65368500  | 0.01205100  |
| C | 2.10991400  | 1.95417000  | 0.84792800  |
| C | 0.47050600  | 2.68524400  | -0.77091700 |
| C | 2.62893200  | 3.24709900  | 0.90228800  |
| H | 2.55353200  | 1.17166900  | 1.45602500  |
| C | 0.99119500  | 3.97855700  | -0.71458500 |
| H | -0.35656600 | 2.46355100  | -1.43844300 |
| C | 2.07051800  | 4.26395900  | 0.12361200  |
| H | 3.46931600  | 3.46179700  | 1.55661300  |
| H | 0.55973600  | 4.76080600  | -1.33303200 |
| H | 2.47743800  | 5.27013400  | 0.16665300  |
| C | -1.59155000 | -2.17930900 | -0.25335700 |
| O | -1.57129900 | -3.32619800 | -0.41714500 |
| C | -3.12675700 | 0.44716500  | 1.35303900  |
| C | -2.67113700 | 1.42685900  | 0.41533600  |
| C | -3.08119500 | 1.01082100  | -0.88542200 |
| C | -3.75827000 | -0.23026200 | -0.76474100 |
| C | -3.79296600 | -0.57425600 | 0.63116900  |
| H | -2.94986300 | 0.45823300  | 2.41941700  |
| H | -2.11552000 | 2.32225300  | 0.65329400  |
| H | -2.86138300 | 1.51838400  | -1.81463800 |
| H | -4.17516800 | -0.81217200 | -1.57443100 |
| H | -4.23190500 | -1.46762900 | 1.05319200  |

**Table 12.** Atom coordinates and absolute energy of **Int4**. (Energy= -1542.82718476 a.u.)

---

| Atom | Coordinates (Angstroms) |             |             |
|------|-------------------------|-------------|-------------|
|      | X                       | Y           | Z           |
| Fe   | -0.51838000             | -1.04439200 | -0.79852000 |
| C    | -1.02193300             | 0.46631000  | -1.56271000 |
| O    | -1.41750000             | 1.39847600  | -2.11415900 |

---

|   |             |             |             |
|---|-------------|-------------|-------------|
| C | -1.48864600 | -0.31845500 | 0.91064600  |
| C | -2.82160000 | 0.15882500  | 1.19304600  |
| C | -3.85334100 | 0.12601800  | 0.23940100  |
| C | -3.10633500 | 0.66629600  | 2.47842000  |
| C | -5.13092400 | 0.58256200  | 0.55953000  |
| H | -3.64270900 | -0.25668700 | -0.75273900 |
| C | -4.38313300 | 1.12093300  | 2.79186800  |
| H | -2.31443400 | 0.69795700  | 3.22015700  |
| C | -5.40171100 | 1.08060500  | 1.83464300  |
| H | -5.91561100 | 0.55129300  | -0.19090400 |
| H | -4.58531200 | 1.50933400  | 3.78597000  |
| H | -6.39708700 | 1.43774900  | 2.08174100  |
| C | -0.30502300 | -0.62423800 | 1.19061500  |
| H | 0.53256000  | -0.80031100 | 1.83919600  |
| P | 1.72042800  | -0.13355900 | -0.94136400 |
| C | 2.76478400  | -0.58936800 | 0.52461900  |
| C | 3.76291800  | 0.28179900  | 1.00587800  |
| C | 2.72220900  | -1.88563100 | 1.07463200  |
| C | 4.66515800  | -0.12369900 | 1.98921100  |
| H | 3.83799500  | 1.28665600  | 0.60413300  |
| C | 3.62485500  | -2.29224100 | 2.05845900  |
| H | 1.96718100  | -2.58574500 | 0.73310800  |
| C | 4.60229200  | -1.41200800 | 2.52416100  |
| H | 5.42115000  | 0.57424900  | 2.33969500  |
| H | 3.55966000  | -3.29896800 | 2.46347600  |
| H | 5.30410200  | -1.72451200 | 3.29198900  |
| C | 1.61114900  | 1.71116300  | -0.74639900 |
| C | 1.87688500  | 2.49180300  | -1.88401200 |
| C | 1.26220600  | 2.37597200  | 0.44375600  |
| C | 1.79393300  | 3.88551600  | -1.84014300 |
| H | 2.15735500  | 1.99892900  | -2.81135700 |
| C | 1.18415300  | 3.76742600  | 0.49172700  |
| H | 1.05357800  | 1.79924200  | 1.33874600  |
| C | 1.44754900  | 4.52745100  | -0.65134200 |
| H | 2.00519900  | 4.46731300  | -2.73328100 |
| H | 0.91407500  | 4.26030800  | 1.42203100  |
| H | 1.38472700  | 5.61143200  | -0.61287900 |
| C | -1.76565100 | -2.20768000 | -2.09886700 |
| C | -1.82922700 | -2.78996900 | -0.80681100 |
| C | -0.51523600 | -3.21170200 | -0.45009700 |
| C | 0.35535400  | -2.90236200 | -1.52895300 |
| C | -0.40532500 | -2.26355700 | -2.54597200 |
| H | -2.59616500 | -1.78695100 | -2.64966100 |
| H | -2.70890700 | -2.85495300 | -0.18236500 |

|   |             |             |             |
|---|-------------|-------------|-------------|
| H | -0.23389900 | -3.66938800 | 0.48767000  |
| H | 1.41988400  | -3.08381900 | -1.56415200 |
| H | -0.02404300 | -1.89399400 | -3.48716300 |

**Table 13.** Atom coordinates and absolute energy of **TS3** (Energy= -1542.81350548 a.u.)

| Atom | Coordinates (Angstroms) |             |             |
|------|-------------------------|-------------|-------------|
|      | X                       | Y           | Z           |
| Fe   | -0.75507000             | -0.99026900 | -0.91580300 |
| C    | -1.17327400             | 0.31482700  | -2.01752200 |
| O    | -1.52150500             | 1.11903600  | -2.77090900 |
| C    | -1.42803800             | 0.08997800  | 0.58045100  |
| C    | -2.71004400             | 0.50532900  | 1.12331200  |
| C    | -3.90890700             | 0.26815100  | 0.42795200  |
| C    | -2.78115000             | 1.16683900  | 2.36738200  |
| C    | -5.13573400             | 0.66770900  | 0.95682300  |
| H    | -3.86345200             | -0.22588600 | -0.53707300 |
| C    | -4.00612300             | 1.56317000  | 2.89437600  |
| H    | -1.86320400             | 1.36610500  | 2.91243900  |
| C    | -5.19018900             | 1.31395400  | 2.19257300  |
| H    | -6.04977600             | 0.47714800  | 0.40126800  |
| H    | -4.04001800             | 2.06982600  | 3.85494600  |
| H    | -6.14523200             | 1.62589600  | 2.60529800  |
| C    | -0.16913700             | 0.11134900  | 0.84962400  |
| H    | 0.50863900              | 0.32191800  | 1.66484600  |
| P    | 1.48842600              | -0.14025900 | -0.74836600 |
| C    | 2.63684700              | -0.78369900 | 0.55299000  |
| C    | 4.00333400              | -0.46204700 | 0.42886600  |
| C    | 2.26312900              | -1.68992800 | 1.55771900  |
| C    | 4.95163400              | -1.01365000 | 1.28688100  |
| H    | 4.32422900              | 0.22780200  | -0.34699700 |
| C    | 3.21711400              | -2.25431400 | 2.41005800  |
| H    | 1.21801200              | -1.95170900 | 1.68268400  |
| C    | 4.56313000              | -1.91734000 | 2.28085400  |
| H    | 5.99798600              | -0.74257000 | 1.17582800  |
| H    | 2.90139200              | -2.95367900 | 3.17973100  |
| H    | 5.30414100              | -2.35289500 | 2.94491800  |
| C    | 1.73271700              | 1.69104200  | -0.64399800 |
| C    | 1.49626100              | 2.44396400  | -1.80707300 |
| C    | 2.17896400              | 2.36386700  | 0.50646500  |
| C    | 1.67643200              | 3.82738400  | -1.81388500 |
| H    | 1.17410100              | 1.94321400  | -2.71524500 |
| C    | 2.37450700              | 3.74493200  | 0.49478800  |

|   |             |             |             |
|---|-------------|-------------|-------------|
| H | 2.39064100  | 1.80481200  | 1.41279500  |
| C | 2.11741700  | 4.48259000  | -0.66281700 |
| H | 1.48261900  | 4.39062700  | -2.72242700 |
| H | 2.72471700  | 4.24607700  | 1.39325700  |
| H | 2.26715300  | 5.55850400  | -0.66951700 |
| C | -2.07343900 | -2.34575100 | -1.85781700 |
| C | -2.06980600 | -2.67711400 | -0.47252200 |
| C | -0.75308800 | -3.05485200 | -0.11803900 |
| C | 0.05792000  | -2.99465700 | -1.29645800 |
| C | -0.75127400 | -2.58244600 | -2.37613100 |
| H | -2.93385700 | -2.03536500 | -2.43508400 |
| H | -2.90833000 | -2.58142500 | 0.20245400  |
| H | -0.41645500 | -3.33194400 | 0.87030200  |
| H | 1.11833300  | -3.20096900 | -1.34281800 |
| H | -0.42939700 | -2.43262200 | -3.39708900 |

**Table 14.** Atom coordinates and absolute energy of **Int5** (Energy= -1542.83517927 a.u.)

---

| Atom | Coordinates (Angstroms) |             |             |
|------|-------------------------|-------------|-------------|
|      | X                       | Y           | Z           |
| Fe   | 2.22868600              | -0.19579400 | -0.81803900 |
| C    | 1.77268700              | -1.76076700 | -1.47975900 |
| O    | 1.44762500              | -2.75285600 | -1.97762200 |
| C    | 0.86744200              | -0.33705200 | 0.52775700  |
| C    | 2.01468900              | -0.42836200 | 1.42824500  |
| C    | 2.96132500              | -1.47313300 | 1.25390000  |
| C    | 2.35205800              | 0.62752900  | 2.32651000  |
| C    | 4.19851100              | -1.43758300 | 1.93350200  |
| H    | 2.68179300              | -2.37766700 | 0.72902600  |
| C    | 3.55293700              | 0.62916900  | 3.00680200  |
| H    | 1.63302900              | 1.42819200  | 2.47259300  |
| C    | 4.49674800              | -0.39907200 | 2.79686600  |
| H    | 4.89796000              | -2.25795900 | 1.80041500  |
| H    | 3.77552100              | 1.42869100  | 3.70828800  |
| H    | 5.44178100              | -0.38442300 | 3.33174100  |
| C    | -0.44642900             | -0.29060300 | 0.77313700  |
| H    | -0.82048400             | -0.41542500 | 1.79379100  |
| P    | -1.67367000             | -0.08307600 | -0.57241000 |
| C    | -2.49462400             | 1.51690500  | -0.11168300 |
| C    | -3.72216600             | 1.85144700  | -0.71174700 |
| C    | -1.88273600             | 2.46766900  | 0.71916600  |
| C    | -4.32200000             | 3.08719500  | -0.47616900 |
| H    | -4.21532400             | 1.13475100  | -1.36374900 |

---

|   |             |             |             |
|---|-------------|-------------|-------------|
| C | -2.47986000 | 3.71024100  | 0.94991600  |
| H | -0.93529800 | 2.22944500  | 1.19393400  |
| C | -3.70168000 | 4.02407000  | 0.35545900  |
| H | -5.27398900 | 3.32185200  | -0.94486500 |
| H | -1.99020500 | 4.43000100  | 1.60089700  |
| H | -4.16743500 | 4.98875800  | 0.53591100  |
| C | -2.95814800 | -1.31885000 | -0.04911600 |
| C | -3.03869500 | -2.51352200 | -0.78123500 |
| C | -3.82017000 | -1.14405500 | 1.04604100  |
| C | -3.94842400 | -3.51179700 | -0.42596100 |
| H | -2.38355300 | -2.66006200 | -1.63629600 |
| C | -4.73342800 | -2.13801100 | 1.39879100  |
| H | -3.78326500 | -0.22231200 | 1.61956400  |
| C | -4.79878400 | -3.32495400 | 0.66439900  |
| H | -3.99661100 | -4.43027900 | -1.00454800 |
| H | -5.39483900 | -1.98671100 | 2.24781700  |
| H | -5.51153500 | -4.09752800 | 0.93948200  |
| C | 3.91207900  | 0.97689100  | -1.47596600 |
| C | 2.98295700  | 1.82149800  | -0.78131900 |
| C | 1.74740600  | 1.78746400  | -1.47585900 |
| C | 1.88486200  | 0.89217300  | -2.57341500 |
| C | 3.24968300  | 0.42231600  | -2.59135100 |
| H | 4.93137300  | 0.77562300  | -1.17569900 |
| H | 3.19057400  | 2.37285000  | 0.12448600  |
| H | 0.83506400  | 2.28758900  | -1.18329700 |
| H | 1.11258900  | 0.64046300  | -3.28632000 |
| H | 3.67364000  | -0.26706700 | -3.30847600 |

**Table 15.** Atom coordinates and absolute energy of **Int5<sup>+</sup>** (Energy= -1542.86696384 a.u.)

| Atom | Coordinates (Angstroms) |             |             |
|------|-------------------------|-------------|-------------|
|      | X                       | Y           | Z           |
| Fe   | -0.75090600             | -0.15324300 | 1.23104200  |
| C    | -0.87543900             | -1.89460900 | 1.23542400  |
| O    | -1.00907700             | -3.04682300 | 1.26289600  |
| C    | -1.42328100             | -0.10376700 | -0.64774700 |
| C    | -2.81042200             | -0.09152100 | -1.14890300 |
| C    | -3.82869500             | -0.79167900 | -0.47636500 |
| C    | -3.15998100             | 0.62489000  | -2.31102000 |
| C    | -5.13577500             | -0.80210700 | -0.96106000 |
| H    | -3.57676100             | -1.33987500 | 0.42566600  |
| C    | -4.46973400             | 0.62933900  | -2.78667000 |
| H    | -2.39374900             | 1.19259600  | -2.83130100 |

|   |             |             |             |
|---|-------------|-------------|-------------|
| C | -5.46320000 | -0.08895200 | -2.11640500 |
| H | -5.90216700 | -1.36275200 | -0.43266000 |
| H | -4.71719900 | 1.19548100  | -3.68073600 |
| H | -6.48432000 | -0.08623600 | -2.48718400 |
| C | -0.33168300 | -0.05356800 | -1.45666000 |
| H | -0.27965800 | -0.05635700 | -2.54657300 |
| P | 0.98264000  | -0.04677800 | -0.24196900 |
| C | 1.98242600  | 1.49110300  | -0.41436700 |
| C | 3.27833000  | 1.57573100  | 0.11856400  |
| C | 1.42575800  | 2.62448700  | -1.02679100 |
| C | 4.00091300  | 2.76684900  | 0.03768700  |
| H | 3.73106800  | 0.70557300  | 0.58540300  |
| C | 2.15155900  | 3.81372700  | -1.10919500 |
| H | 0.42488700  | 2.56758700  | -1.44468000 |
| C | 3.43997000  | 3.88861300  | -0.57612500 |
| H | 5.00440400  | 2.81648700  | 0.45106300  |
| H | 1.71129100  | 4.68075300  | -1.59387800 |
| H | 4.00466600  | 4.81419300  | -0.64137400 |
| C | 2.21395200  | -1.37877900 | -0.54366900 |
| C | 2.44318700  | -2.35226000 | 0.43756200  |
| C | 2.91705900  | -1.45343800 | -1.75810500 |
| C | 3.35713600  | -3.38441600 | 0.21080200  |
| H | 1.90040700  | -2.30246800 | 1.37626100  |
| C | 3.82319900  | -2.48734700 | -1.98574800 |
| H | 2.75810100  | -0.69996600 | -2.52471900 |
| C | 4.04470300  | -3.45447600 | -1.00055300 |
| H | 3.52623500  | -4.13371700 | 0.97876900  |
| H | 4.35753400  | -2.53967300 | -2.93014100 |
| H | 4.75133000  | -4.25988200 | -1.17965900 |
| C | -2.15841700 | 0.26885200  | 2.78980200  |
| C | -2.10919300 | 1.37911700  | 1.90621700  |
| C | -0.78512300 | 1.89427900  | 1.90712500  |
| C | -0.01501000 | 1.11416500  | 2.83246600  |
| C | -0.85489800 | 0.12172600  | 3.38186800  |
| H | -3.02827200 | -0.33491300 | 3.00762300  |
| H | -2.92358300 | 1.72290500  | 1.28422100  |
| H | -0.42273400 | 2.73082800  | 1.32732600  |
| H | 1.03671300  | 1.24729700  | 3.04665000  |
| H | -0.56567000 | -0.63302600 | 4.10038400  |

**Table 16.** Atom coordinates and absolute energy of **Int6** (Energy= -1542.8348128 a.u.)

---

| Atom | Coordinates (Angstroms) |   |   |
|------|-------------------------|---|---|
|      | X                       | Y | Z |

---



---

|    |             |             |             |
|----|-------------|-------------|-------------|
| Fe | -2.59412300 | 0.30151500  | -0.70909900 |
| C  | -2.27749100 | 1.98465000  | -1.10358800 |
| O  | -2.06226900 | 3.07178500  | -1.43759700 |
| C  | -0.80624400 | 0.12026900  | -0.01506800 |
| C  | -1.52705000 | -0.04399600 | 1.24020400  |
| C  | -2.39072800 | 0.99268100  | 1.68804000  |
| C  | -1.60765600 | -1.30757700 | 1.90258800  |
| C  | -3.30600100 | 0.75569100  | 2.73941500  |
| H  | -2.23496500 | 2.01115200  | 1.35648400  |
| C  | -2.48445300 | -1.50813900 | 2.94738500  |
| H  | -0.94764400 | -2.10279800 | 1.57074800  |
| C  | -3.35863200 | -0.47747500 | 3.36014700  |
| H  | -3.93880300 | 1.56971100  | 3.08118000  |
| H  | -2.50497500 | -2.46687500 | 3.45841000  |
| H  | -4.04929200 | -0.64999500 | 4.18030100  |
| C  | 0.48385300  | 0.06529400  | -0.35532100 |
| H  | 0.76043400  | 0.14453100  | -1.40825200 |
| P  | 1.84758900  | -0.12562900 | 0.86600900  |
| C  | 2.81250200  | -1.50259100 | 0.07376200  |
| C  | 2.82357300  | -2.74641900 | 0.72312600  |
| C  | 3.49198200  | -1.37977800 | -1.14988600 |
| C  | 3.48583300  | -3.84222900 | 0.16427500  |
| H  | 2.31404200  | -2.85251600 | 1.67773400  |
| C  | 4.15637800  | -2.47160900 | -1.70839800 |
| H  | 3.51036100  | -0.42119900 | -1.66047700 |
| C  | 4.15322700  | -3.70631900 | -1.05332600 |
| H  | 3.48623400  | -4.79712200 | 0.68296200  |
| H  | 4.67876700  | -2.35986100 | -2.65484700 |
| H  | 4.67328100  | -4.55528800 | -1.48844500 |
| C  | 2.90587100  | 1.34125100  | 0.45348300  |
| C  | 2.36659100  | 2.51073100  | -0.10344000 |
| C  | 4.26425200  | 1.34088100  | 0.81752400  |
| C  | 3.16325800  | 3.64105200  | -0.30295500 |
| H  | 1.31843500  | 2.53792300  | -0.38680000 |
| C  | 5.05984900  | 2.46732300  | 0.61411500  |
| H  | 4.70533400  | 0.44927800  | 1.25569800  |
| C  | 4.51195100  | 3.62356200  | 0.05219300  |
| H  | 2.72625700  | 4.53466400  | -0.74077600 |
| H  | 6.10912600  | 2.44317600  | 0.89613600  |
| H  | 5.13145800  | 4.50209400  | -0.10468500 |
| C  | -4.49668700 | -0.69195400 | -0.89777600 |
| C  | -3.44826000 | -1.67009800 | -0.85795300 |
| C  | -2.58501500 | -1.44068700 | -1.95910900 |

---

|   |             |             |             |
|---|-------------|-------------|-------------|
| C | -3.06279500 | -0.29878700 | -2.66108100 |
| C | -4.27760800 | 0.14007300  | -2.01600400 |
| H | -5.29354500 | -0.58905200 | -0.17406500 |
| H | -3.33017100 | -2.43496800 | -0.10439000 |
| H | -1.67693200 | -1.98351200 | -2.18005300 |
| H | -2.62304700 | 0.13400500  | -3.54880800 |
| H | -4.88583200 | 0.98257400  | -2.31492700 |

**Table 17.** Atom coordinates and absolute energy of **Int7** (Energy= -2347.86450751 a.u.)

| Atom | Coordinates (Angstroms) |             |             |
|------|-------------------------|-------------|-------------|
|      | X                       | Y           | Z           |
| Fe   | 1.43033000              | 1.19920000  | -0.96733800 |
| P    | 1.95396700              | -0.61454100 | 0.22966000  |
| H    | 1.36224300              | -0.66039500 | 1.50984100  |
| C    | 3.72116700              | -0.88222000 | 0.68970400  |
| C    | 4.73982500              | -0.19202600 | 0.02053200  |
| C    | 4.06526300              | -1.78254000 | 1.71166400  |
| C    | 6.07894600              | -0.40034400 | 0.36061800  |
| H    | 4.48132500              | 0.51557700  | -0.76078100 |
| C    | 5.40045500              | -1.98453400 | 2.05511400  |
| H    | 3.28730700              | -2.32928700 | 2.23790800  |
| C    | 6.41027200              | -1.29449200 | 1.37795900  |
| H    | 6.85967000              | 0.14176600  | -0.16513500 |
| H    | 5.65420800              | -2.67880500 | 2.85099400  |
| H    | 7.45066100              | -1.45218900 | 1.64725600  |
| C    | 1.44574100              | -2.28134000 | -0.37789700 |
| C    | 2.20340000              | -2.94003500 | -1.35915300 |
| C    | 0.28276500              | -2.89718800 | 0.10869900  |
| C    | 1.79946500              | -4.18045500 | -1.85253400 |
| H    | 3.12713900              | -2.49809500 | -1.72173500 |
| C    | -0.11901200             | -4.13954200 | -0.38757600 |
| H    | -0.31377300             | -2.41566300 | 0.87676300  |
| C    | 0.63410600              | -4.78149400 | -1.37116300 |
| H    | 2.39929900              | -4.68039600 | -2.60772800 |
| H    | -1.01867100             | -4.60514700 | 0.00449500  |
| H    | 0.32133100              | -5.74838700 | -1.75453600 |
| C    | 2.30663900              | 2.26179200  | 0.12091500  |
| O    | 2.91786700              | 2.98515000  | 0.78492000  |
| C    | -0.28422000             | 1.39192500  | 0.06640000  |
| C    | -0.49747700             | 2.63892000  | 0.85096800  |
| C    | -0.51636500             | 2.61389800  | 2.25666600  |
| C    | -0.64772400             | 3.88600600  | 0.21671000  |

|   |             |             |             |
|---|-------------|-------------|-------------|
| C | -0.68647000 | 3.78418200  | 2.99825800  |
| H | -0.39835400 | 1.66490200  | 2.77163000  |
| C | -0.83320200 | 5.05258000  | 0.95585500  |
| H | -0.63401700 | 3.93356300  | -0.86792900 |
| C | -0.84838800 | 5.00969100  | 2.35235500  |
| H | -0.69875700 | 3.73431200  | 4.08381600  |
| H | -0.96487600 | 6.00019100  | 0.43985400  |
| H | -0.98456700 | 5.92068400  | 2.92799700  |
| C | -1.24840600 | 0.44961300  | -0.01363200 |
| H | -1.05937300 | -0.45645700 | -0.59076100 |
| P | -2.97443000 | 0.62678700  | 0.62095100  |
| C | -3.89996400 | 0.02735600  | -0.87636800 |
| C | -4.75096600 | 0.93852400  | -1.52031600 |
| C | -3.75986500 | -1.25842300 | -1.42776700 |
| C | -5.43876000 | 0.58232500  | -2.68358800 |
| H | -4.87499700 | 1.93427600  | -1.10245600 |
| C | -4.44731200 | -1.61770600 | -2.58689100 |
| H | -3.11553300 | -1.98612100 | -0.94221000 |
| C | -5.28802700 | -0.69683600 | -3.21898000 |
| H | -6.09416000 | 1.30208800  | -3.16653600 |
| H | -4.32867500 | -2.61676300 | -2.99834900 |
| H | -5.82371000 | -0.97802700 | -4.12153800 |
| C | -3.12999200 | -0.83671500 | 1.75499600  |
| C | -2.07759800 | -1.18694800 | 2.61770200  |
| C | -4.34937000 | -1.52279900 | 1.89380500  |
| C | -2.22922300 | -2.19621900 | 3.57130100  |
| H | -1.12978100 | -0.66150100 | 2.53959500  |
| C | -4.50187200 | -2.53256500 | 2.84454300  |
| H | -5.18559900 | -1.27049100 | 1.24816900  |
| C | -3.44234100 | -2.87644200 | 3.68720000  |
| H | -1.39807900 | -2.44912300 | 4.22477000  |
| H | -5.45294600 | -3.05220300 | 2.92728100  |
| H | -3.56283300 | -3.66199400 | 4.42779200  |
| C | 1.35260000  | 2.54338400  | -2.65335700 |
| C | 0.26548300  | 1.63518800  | -2.75064300 |
| C | 0.78625900  | 0.31833300  | -2.84609600 |
| C | 2.21655800  | 0.41811600  | -2.85119500 |
| C | 2.56764600  | 1.78198200  | -2.73497500 |
| H | 1.28336400  | 3.61784500  | -2.55904400 |
| H | -0.78187000 | 1.89142500  | -2.69384700 |
| H | 0.21092200  | -0.59275700 | -2.92329000 |
| H | 2.90747600  | -0.40952700 | -2.93022700 |
| H | 3.57086600  | 2.18493600  | -2.69876600 |

**Table 18.** Atom coordinates and absolute energy of **Int7** (Energy= -2347.85782385 a.u.)

| Atom | Coordinates (Angstroms) |             |             |
|------|-------------------------|-------------|-------------|
|      | X                       | Y           | Z           |
| Fe   | -1.11333700             | -1.06318600 | -1.04914900 |
| P    | -1.95535500             | 0.61285500  | 0.16985300  |
| H    | -1.55632300             | 0.61102800  | 1.52269100  |
| C    | -3.78590000             | 0.67897900  | 0.40064600  |
| C    | -4.64412300             | 0.13318200  | -0.56302100 |
| C    | -4.33970200             | 1.29670800  | 1.53336900  |
| C    | -6.02953500             | 0.21039200  | -0.40369900 |
| H    | -4.22667100             | -0.36352400 | -1.43343600 |
| C    | -5.72227100             | 1.36523500  | 1.69654200  |
| H    | -3.68845800             | 1.72677400  | 2.28964000  |
| C    | -6.56991600             | 0.82427600  | 0.72610000  |
| H    | -6.68393300             | -0.21767700 | -1.15761400 |
| H    | -6.13852500             | 1.83916200  | 2.58082700  |
| H    | -7.64715200             | 0.87714300  | 0.85462200  |
| C    | -1.56853300             | 2.37061200  | -0.23157100 |
| C    | -2.22947000             | 3.02292300  | -1.28360000 |
| C    | -0.62110700             | 3.08025800  | 0.51887500  |
| C    | -1.94482200             | 4.35484300  | -1.58242400 |
| H    | -2.99204600             | 2.50087400  | -1.85438700 |
| C    | -0.34277600             | 4.41628500  | 0.22184800  |
| H    | -0.09657200             | 2.59560200  | 1.33668100  |
| C    | -0.99976200             | 5.05547400  | -0.82967200 |
| H    | -2.46865000             | 4.84791500  | -2.39633100 |
| H    | 0.38492600              | 4.95668700  | 0.82019700  |
| H    | -0.78313200             | 6.09506000  | -1.05745900 |
| C    | -2.25675700             | -2.21433200 | -0.36669500 |
| O    | -3.06486000             | -2.97237500 | -0.03576300 |
| C    | 0.25474500              | -1.33246400 | 0.41953800  |
| C    | -0.05938000             | -2.38459100 | 1.43893500  |
| C    | -0.29910400             | -2.04604900 | 2.78291900  |
| C    | -0.08817500             | -3.74881800 | 1.09375700  |
| C    | -0.57291000             | -3.02730700 | 3.73853600  |
| H    | -0.25950700             | -1.00099500 | 3.07819700  |
| C    | -0.34058200             | -4.73010600 | 2.05017300  |
| H    | 0.09455700              | -4.03423100 | 0.06126900  |
| C    | -0.59261800             | -4.37460900 | 3.37816700  |
| H    | -0.76296600             | -2.73611000 | 4.76846400  |
| H    | -0.34391500             | -5.77702200 | 1.75792400  |
| H    | -0.80076500             | -5.13944800 | 4.12090000  |

|   |             |             |             |
|---|-------------|-------------|-------------|
| C | 1.43283100  | -0.70189000 | 0.65888600  |
| H | 1.99842100  | -1.03177800 | 1.53699200  |
| P | 2.28866700  | 0.59874700  | -0.30727400 |
| C | 3.17907400  | 1.50483300  | 1.05643900  |
| C | 3.02368100  | 2.89608100  | 1.14174200  |
| C | 4.00889500  | 0.86822200  | 1.99485100  |
| C | 3.66358400  | 3.63191800  | 2.14366200  |
| H | 2.40154800  | 3.40521600  | 0.41122600  |
| C | 4.64568500  | 1.59848300  | 2.99755200  |
| H | 4.17101900  | -0.20427100 | 1.93253700  |
| C | 4.47229500  | 2.98343400  | 3.07645100  |
| H | 3.53444300  | 4.71017100  | 2.19094600  |
| H | 5.28391900  | 1.08888600  | 3.71452000  |
| H | 4.97179000  | 3.55194100  | 3.85611300  |
| C | 3.73075000  | -0.34911000 | -1.01508500 |
| C | 3.86052900  | -1.74376200 | -0.93683700 |
| C | 4.71059500  | 0.37230200  | -1.72031900 |
| C | 4.94037600  | -2.39675700 | -1.53992900 |
| H | 3.11451900  | -2.32052100 | -0.39787800 |
| C | 5.79208900  | -0.27658200 | -2.31281800 |
| H | 4.62654800  | 1.45362700  | -1.80161800 |
| C | 5.91012700  | -1.66695900 | -2.22637100 |
| H | 5.02352600  | -3.47802600 | -1.46572900 |
| H | 6.54096200  | 0.30116600  | -2.84813000 |
| H | 6.74960400  | -2.17453700 | -2.69322100 |
| C | -0.57303400 | -2.25459600 | -2.75865500 |
| C | 0.42954000  | -1.26647400 | -2.56812200 |
| C | -0.16814600 | 0.01403700  | -2.69204700 |
| C | -1.55425200 | -0.18348100 | -2.99878800 |
| C | -1.80377800 | -1.57381300 | -3.04843200 |
| H | -0.42969200 | -3.32558200 | -2.73001600 |
| H | 1.46278700  | -1.46361100 | -2.32528800 |
| H | 0.33540200  | 0.96132900  | -2.57578600 |
| H | -2.28173700 | 0.59772600  | -3.16967100 |
| H | -2.75684600 | -2.04583900 | -3.24732300 |

**Table 19.** Atom coordinates and absolute energy of **TS4** (Energy= -2347.798495809 a.u.)

---

| Atom | Coordinates (Angstroms) |             |             |
|------|-------------------------|-------------|-------------|
|      | X                       | Y           | Z           |
| Fe   | 1.06200900              | -0.95717700 | 1.25278000  |
| P    | 2.30512200              | 0.42764600  | -0.10619000 |
| H    | 0.87062400              | -0.14357300 | -0.62584600 |

---

|   |             |             |             |
|---|-------------|-------------|-------------|
| C | 3.99740000  | 0.00324000  | -0.66524000 |
| C | 4.77767200  | -0.95013900 | 0.00778000  |
| C | 4.53136700  | 0.62661900  | -1.80884700 |
| C | 6.05440200  | -1.27842700 | -0.45336200 |
| H | 4.38493500  | -1.43279300 | 0.89623900  |
| C | 5.80949000  | 0.30523500  | -2.26106600 |
| H | 3.93967400  | 1.36507300  | -2.34211400 |
| C | 6.57319300  | -0.65204800 | -1.58673800 |
| H | 6.64395800  | -2.02046300 | 0.07774800  |
| H | 6.20735600  | 0.79551800  | -3.14520000 |
| H | 7.56639100  | -0.90749800 | -1.94490300 |
| C | 2.34214700  | 2.20440000  | 0.33504900  |
| C | 3.49301000  | 2.79563300  | 0.88664700  |
| C | 1.20270000  | 3.00781200  | 0.14970400  |
| C | 3.50022600  | 4.14518600  | 1.24203100  |
| H | 4.38951300  | 2.19992500  | 1.03085000  |
| C | 1.20930800  | 4.35307300  | 0.51824600  |
| H | 0.30926900  | 2.58711300  | -0.30048000 |
| C | 2.35817500  | 4.92872600  | 1.06522000  |
| H | 4.40132700  | 4.58308700  | 1.66302900  |
| H | 0.31713500  | 4.95332600  | 0.36174800  |
| H | 2.36547400  | 5.97821000  | 1.34484100  |
| C | 1.82480900  | -2.43083900 | 0.65823700  |
| O | 2.33538900  | -3.43134400 | 0.38651400  |
| C | -0.37348900 | -0.89819000 | -0.37884900 |
| C | -0.51349800 | -2.14514100 | -1.17273800 |
| C | 0.32109400  | -2.39176800 | -2.27795500 |
| C | -1.45934000 | -3.12515100 | -0.82264400 |
| C | 0.20376200  | -3.57022800 | -3.01313600 |
| H | 1.05765000  | -1.64716800 | -2.56760500 |
| C | -1.56919700 | -4.30773500 | -1.55503300 |
| H | -2.10539500 | -2.95621100 | 0.03371900  |
| C | -0.73953600 | -4.53575500 | -2.65399200 |
| H | 0.85230900  | -3.73514000 | -3.86921500 |
| H | -2.30763300 | -5.05119600 | -1.26670600 |
| H | -0.82615900 | -5.45580700 | -3.22475200 |
| C | -1.35040400 | 0.03956100  | -0.34194500 |
| H | -1.16930300 | 0.95150600  | 0.22925300  |
| P | -2.96044800 | -0.01222600 | -1.25797400 |
| C | -4.12928100 | -0.48862000 | 0.10705500  |
| C | -4.99986400 | -1.56299400 | -0.12836900 |
| C | -4.16435500 | 0.14001600  | 1.36476900  |
| C | -5.88062900 | -2.00273600 | 0.86390000  |
| H | -4.98219100 | -2.05899000 | -1.09501600 |

|   |             |             |             |
|---|-------------|-------------|-------------|
| C | -5.04148700 | -0.29875900 | 2.35693600  |
| H | -3.51330600 | 0.98675100  | 1.56292400  |
| C | -5.90086900 | -1.37324800 | 2.10837200  |
| H | -6.54892700 | -2.83539900 | 0.66284800  |
| H | -5.05761900 | 0.19874700  | 3.32291900  |
| H | -6.58362400 | -1.71402400 | 2.88160300  |
| C | -3.25275700 | 1.81100400  | -1.41455100 |
| C | -2.24279300 | 2.59524400  | -2.00125200 |
| C | -4.46942400 | 2.43137600  | -1.09027600 |
| C | -2.43142200 | 3.95911000  | -2.22731900 |
| H | -1.30182900 | 2.13380600  | -2.29164100 |
| C | -4.66046200 | 3.79507400  | -1.32301800 |
| H | -5.27153900 | 1.85075500  | -0.64564800 |
| C | -3.64235600 | 4.56560800  | -1.88632500 |
| H | -1.63436000 | 4.54521600  | -2.67687700 |
| H | -5.60884800 | 4.25570500  | -1.05951100 |
| H | -3.79284000 | 5.62656400  | -2.06430100 |
| C | 0.31764900  | -1.88202800 | 3.06863000  |
| C | -0.53141500 | -0.80521300 | 2.72305700  |
| C | 0.24073100  | 0.39451200  | 2.71310100  |
| C | 1.57449700  | 0.05134700  | 3.09314900  |
| C | 1.63345200  | -1.34611500 | 3.30434600  |
| H | 0.02990700  | -2.92167900 | 3.14280600  |
| H | -1.57421700 | -0.88764600 | 2.45241200  |
| H | -0.11490200 | 1.39030500  | 2.49117000  |
| H | 2.40609400  | 0.73892500  | 3.15706400  |
| H | 2.51056900  | -1.91274800 | 3.58526600  |

**Table 20.** Atom coordinates and absolute energy of **TS4** (Energy= -2347.79116652 a.u.)

| Atom | Coordinates (Angstroms) |             |             |
|------|-------------------------|-------------|-------------|
|      | X                       | Y           | Z           |
| Fe   | -0.94942100             | -0.82929100 | -1.42601700 |
| P    | -1.91631700             | 0.77143500  | -0.05707400 |
| H    | -0.64483700             | -0.12470100 | 0.45217300  |
| C    | -3.60235200             | 0.52677900  | 0.62200600  |
| C    | -4.63514800             | -0.02997000 | -0.14975100 |
| C    | -3.88192200             | 0.90677300  | 1.94724100  |
| C    | -5.91104800             | -0.20652400 | 0.38889900  |
| H    | -4.43742800             | -0.32527500 | -1.17521700 |
| C    | -5.15766100             | 0.73281500  | 2.48370400  |
| H    | -3.09391100             | 1.34099600  | 2.55585400  |
| C    | -6.17429500             | 0.17327500  | 1.70588800  |

|   |             |             |             |
|---|-------------|-------------|-------------|
| H | -6.69813500 | -0.64079400 | -0.22108800 |
| H | -5.35666000 | 1.02956000  | 3.50969200  |
| H | -7.16645900 | 0.03278900  | 2.12537700  |
| C | -1.79055700 | 2.55092700  | -0.47047300 |
| C | -2.93860500 | 3.35067300  | -0.61196600 |
| C | -0.52992700 | 3.14962200  | -0.65149700 |
| C | -2.82605400 | 4.70719300  | -0.92183200 |
| H | -3.92328500 | 2.91556800  | -0.47587400 |
| C | -0.42544000 | 4.50410000  | -0.96489800 |
| H | 0.37150300  | 2.55494700  | -0.53609300 |
| C | -1.57164100 | 5.29120700  | -1.10156500 |
| H | -3.72654400 | 5.30674600  | -1.02555500 |
| H | 0.55845200  | 4.94688800  | -1.09579400 |
| H | -1.48739300 | 6.34683400  | -1.34301200 |
| C | -2.15882200 | -2.05775000 | -1.04675700 |
| O | -2.96949700 | -2.87487600 | -0.94876200 |
| C | 0.25690900  | -1.29651800 | 0.35163000  |
| C | -0.21678800 | -2.53134800 | 1.04380200  |
| C | -1.25974400 | -2.48883000 | 1.98662900  |
| C | 0.38660200  | -3.77354500 | 0.78000600  |
| C | -1.67798700 | -3.64634500 | 2.64189600  |
| H | -1.73893800 | -1.54137300 | 2.21522900  |
| C | -0.03823500 | -4.93216500 | 1.43079500  |
| H | 1.18800000  | -3.82591300 | 0.04789400  |
| C | -1.07226300 | -4.87426700 | 2.36663200  |
| H | -2.48030900 | -3.58730900 | 3.37238300  |
| H | 0.44189800  | -5.88128000 | 1.20732600  |
| H | -1.40318100 | -5.77523500 | 2.87504000  |
| C | 1.51600100  | -0.89683900 | 0.66652700  |
| H | 2.07466900  | -1.48690300 | 1.40160700  |
| P | 2.36015600  | 0.63901100  | 0.11980900  |
| C | 3.07955500  | 1.18562300  | 1.74222700  |
| C | 2.44226600  | 2.24751200  | 2.40330700  |
| C | 4.19979300  | 0.59226100  | 2.34536800  |
| C | 2.90463100  | 2.69853000  | 3.64112200  |
| H | 1.58119100  | 2.72642300  | 1.94392700  |
| C | 4.66569900  | 1.04647800  | 3.57956500  |
| H | 4.71576500  | -0.22174500 | 1.84454400  |
| C | 4.01832500  | 2.09917600  | 4.23100100  |
| H | 2.39916600  | 3.52108700  | 4.13949400  |
| H | 5.53543100  | 0.57875600  | 4.03309400  |
| H | 4.38344100  | 2.45237400  | 5.19135500  |
| C | 3.86222000  | -0.02189500 | -0.74549700 |
| C | 4.12415700  | -1.38732300 | -0.93851500 |



|   |             |             |             |
|---|-------------|-------------|-------------|
| C | 4.76248200  | 0.91259300  | -1.28774900 |
| C | 5.25306700  | -1.80545900 | -1.64950500 |
| H | 3.44536900  | -2.13046500 | -0.53092400 |
| C | 5.89442200  | 0.49604800  | -1.98605800 |
| H | 4.57408600  | 1.97602100  | -1.16067200 |
| C | 6.14217000  | -0.86675200 | -2.17225100 |
| H | 5.43779400  | -2.86729800 | -1.78848600 |
| H | 6.57938000  | 1.23480600  | -2.39296800 |
| H | 7.01958700  | -1.19233700 | -2.72360600 |
| C | -0.29218600 | -1.83871500 | -3.22606400 |
| C | 0.75197600  | -0.99967300 | -2.76942600 |
| C | 0.28300700  | 0.34626200  | -2.76132500 |
| C | -1.06072700 | 0.33661800  | -3.24588200 |
| C | -1.42290000 | -1.00018100 | -3.53107300 |
| H | -0.24758100 | -2.91350000 | -3.33539700 |
| H | 1.72597100  | -1.32889900 | -2.43828900 |
| H | 0.84923100  | 1.21701000  | -2.46988500 |
| H | -1.70520300 | 1.20013200  | -3.33168900 |
| H | -2.38163300 | -1.33622400 | -3.90187800 |

**Table 21.** Atom coordinates and absolute energy of **2-Z** (Energy= -1113.25996786 a.u.)

---

| Atom | Coordinates (Angstroms) |             |             |
|------|-------------------------|-------------|-------------|
|      | X                       | Y           | Z           |
| C    | 1.67100400              | -1.20539400 | 1.35648200  |
| C    | 2.86604000              | -0.90007900 | 0.55806900  |
| C    | 2.91893200              | 0.10894200  | -0.42143800 |
| C    | 4.03250700              | -1.65247800 | 0.79625700  |
| C    | 4.08241700              | 0.32573700  | -1.15769100 |
| H    | 2.06229500              | 0.75150800  | -0.58520700 |
| C    | 5.19311700              | -1.43726000 | 0.05910800  |
| H    | 4.01559700              | -2.42419200 | 1.56168100  |
| C    | 5.22072200              | -0.44794500 | -0.92647100 |
| H    | 4.10199800              | 1.11204500  | -1.90658500 |
| H    | 6.07709200              | -2.03707300 | 0.25545800  |
| H    | 6.12634100              | -0.27270400 | -1.49975900 |
| C    | 0.36426200              | -1.00212500 | 1.08814100  |
| H    | -0.34368600             | -1.33465500 | 1.84612000  |
| P    | -0.39218000             | -0.39144500 | -0.47223300 |
| C    | -2.10759500             | -1.06364900 | -0.24448700 |
| C    | -3.04824300             | -0.52835800 | 0.64958700  |
| C    | -2.46615300             | -2.18581400 | -1.00607300 |
| C    | -4.31091700             | -1.10570100 | 0.78163800  |

---

|   |             |             |             |
|---|-------------|-------------|-------------|
| H | -2.79394400 | 0.34874700  | 1.23735000  |
| C | -3.72813800 | -2.76783600 | -0.87091400 |
| H | -1.75213700 | -2.60308400 | -1.71132500 |
| C | -4.65285300 | -2.22782900 | 0.02297800  |
| H | -5.02958700 | -0.67909500 | 1.47596000  |
| H | -3.98953800 | -3.63715200 | -1.46763500 |
| H | -5.63742000 | -2.67515400 | 0.12569300  |
| C | -0.65658100 | 1.41605000  | -0.13368200 |
| C | -1.30506100 | 2.17359800  | -1.12503700 |
| C | -0.19408700 | 2.07420700  | 1.01491000  |
| C | -1.50378700 | 3.54289500  | -0.96182100 |
| H | -1.65775000 | 1.68587300  | -2.03052800 |
| C | -0.38297200 | 3.44980000  | 1.17262800  |
| H | 0.31701600  | 1.50881900  | 1.78807400  |
| C | -1.04092500 | 4.18670900  | 0.18876700  |
| H | -2.01250300 | 4.11007500  | -1.73627200 |
| H | -0.01728100 | 3.94270300  | 2.06923000  |
| H | -1.18870100 | 5.25553500  | 0.31314000  |
| H | 1.89477200  | -1.70133900 | 2.30239300  |

**Table 22.** Atom coordinates and absolute energy of **2-E** (Energy= -1113.26277922 a.u.)

---

| Atom | Coordinates (Angstroms) |             |             |
|------|-------------------------|-------------|-------------|
|      | X                       | Y           | Z           |
| C    | 1.91013300              | 0.01021300  | -0.87022000 |
| C    | 3.25967200              | -0.01347000 | -0.28590700 |
| C    | 3.50174600              | -0.14201200 | 1.09450400  |
| C    | 4.36742500              | 0.09442800  | -1.14470600 |
| C    | 4.80090700              | -0.15586400 | 1.59154000  |
| H    | 2.66758500              | -0.23900900 | 1.78230200  |
| C    | 5.66939100              | 0.08168000  | -0.64774300 |
| H    | 4.19889600              | 0.19099300  | -2.21421100 |
| C    | 5.89138600              | -0.04296900 | 0.72369300  |
| H    | 4.96624800              | -0.25808100 | 2.66020500  |
| H    | 6.50914700              | 0.16775600  | -1.33110800 |
| H    | 6.90418800              | -0.05511800 | 1.11533500  |
| C    | 0.73069800              | 0.00442100  | -0.22341400 |
| H    | 0.69383700              | -0.01821800 | 0.86571400  |
| P    | -0.85180000             | -0.00283300 | -1.14874500 |
| C    | -1.70960100             | -1.42999000 | -0.32454900 |
| C    | -2.10629400             | -1.43270600 | 1.02290900  |
| C    | -1.93356200             | -2.58167900 | -1.09277700 |
| C    | -2.70513200             | -2.55917200 | 1.58509500  |

---

|   |             |             |             |
|---|-------------|-------------|-------------|
| H | -1.95755100 | -0.54468500 | 1.63035800  |
| C | -2.53145700 | -3.71169400 | -0.53050900 |
| H | -1.63862700 | -2.59027800 | -2.13868900 |
| C | -2.91753100 | -3.70201200 | 0.80949700  |
| H | -3.00767700 | -2.54629200 | 2.62857100  |
| H | -2.69862300 | -4.59511300 | -1.14016300 |
| H | -3.38551600 | -4.57846900 | 1.24859800  |
| C | -1.72227300 | 1.44764800  | -0.38861800 |
| C | -3.12642500 | 1.50661200  | -0.39788900 |
| C | -1.01143700 | 2.56225200  | 0.08146100  |
| C | -3.79667700 | 2.63781100  | 0.06497500  |
| H | -3.70050600 | 0.65822200  | -0.76022000 |
| C | -1.68355600 | 3.69586200  | 0.54299400  |
| H | 0.07452700  | 2.54463500  | 0.08816700  |
| C | -3.07755600 | 3.73752300  | 0.53862600  |
| H | -4.88290500 | 2.66047400  | 0.05551600  |
| H | -1.11409600 | 4.54609000  | 0.90831700  |
| H | -3.60021700 | 4.61894500  | 0.89855100  |
| H | 1.88914900  | 0.03935700  | -1.95984300 |

**Table 23.** Atom coordinates and absolute energy of **Int8** (Energy= -2347.8566437 a.u.)

| Atom | Coordinates (Angstroms) |             |             |
|------|-------------------------|-------------|-------------|
|      | X                       | Y           | Z           |
| Fe   | 0.13209500              | -1.60498600 | -0.37182100 |
| C    | 0.14222400              | -1.51329600 | 1.38906900  |
| O    | 0.12890600              | -1.56826600 | 2.54204400  |
| P    | 2.60274800              | -1.39172500 | -0.27737400 |
| C    | 3.28053700              | -0.23125400 | -1.54359700 |
| C    | 2.68226900              | -0.16019200 | -2.81932900 |
| C    | 3.26802800              | 0.55239700  | -3.86586200 |
| C    | 4.48064500              | 1.21712600  | -3.67377100 |
| C    | 5.10267600              | 1.14062900  | -2.42600700 |
| C    | 4.51792800              | 0.42569900  | -1.38091300 |
| C    | 3.23311700              | -0.75644800 | 1.34261700  |
| C    | 3.47482500              | -1.74471700 | 2.31783500  |
| C    | 3.97531700              | -1.41788700 | 3.57704100  |
| C    | 4.26716400              | -0.08832000 | 3.88860100  |
| C    | 4.04342800              | 0.90401100  | 2.93312900  |
| C    | 3.52405000              | 0.57727700  | 1.67911900  |
| P    | -2.40763600             | 0.46071900  | 0.78222900  |
| C    | -3.74446200             | -0.78394500 | 0.44725100  |
| C    | -3.88273200             | -1.84686300 | 1.35349200  |

|   |             |             |             |
|---|-------------|-------------|-------------|
| C | -4.85579800 | -2.83047600 | 1.15977600  |
| C | -5.71342700 | -2.75749400 | 0.06093400  |
| C | -5.59743800 | -1.69539500 | -0.84015700 |
| C | -4.62191500 | -0.71553800 | -0.64731700 |
| C | -3.22282400 | 2.01419000  | 0.17068300  |
| C | -4.23111000 | 2.56067900  | 0.98501100  |
| C | -4.87870500 | 3.74176700  | 0.62854800  |
| C | -4.51871700 | 4.41210100  | -0.54357000 |
| C | -3.51045300 | 3.88952100  | -1.35270200 |
| C | -2.86836400 | 2.69899300  | -1.00035300 |
| C | 0.03252100  | 0.62666400  | -0.80174600 |
| C | 0.69414400  | 1.68052200  | 0.00308800  |
| C | 1.50483300  | 2.59917800  | -0.69222300 |
| C | 2.05416500  | 3.70907400  | -0.05154100 |
| C | 1.81078100  | 3.92658400  | 1.30570900  |
| C | 1.02766600  | 3.01305900  | 2.01441600  |
| C | 0.48178500  | 1.90078100  | 1.37674200  |
| C | -1.23922800 | 0.07962100  | -0.60772900 |
| H | 1.74464100  | -0.67767800 | -2.99726900 |
| H | 2.77423600  | 0.58753100  | -4.83388900 |
| H | 4.93746200  | 1.77680400  | -4.48482500 |
| H | 6.05470100  | 1.63914700  | -2.26222900 |
| H | 5.03554400  | 0.37100900  | -0.42977300 |
| H | 3.27846700  | -2.78645000 | 2.07581200  |
| H | 4.15006200  | -2.20206100 | 4.30878100  |
| H | 4.66825000  | 0.17058400  | 4.86466300  |
| H | 4.26234000  | 1.94296600  | 3.16468200  |
| H | 3.35169100  | 1.36757800  | 0.95906000  |
| H | -3.22522100 | -1.89942700 | 2.21739200  |
| H | -4.94976700 | -3.64622000 | 1.87132400  |
| H | -6.47479000 | -3.51782400 | -0.08834500 |
| H | -6.27066500 | -1.62755300 | -1.69044600 |
| H | -4.54986400 | 0.11469800  | -1.34443300 |
| H | -4.51043500 | 2.05585100  | 1.90682400  |
| H | -5.65842300 | 4.14402700  | 1.26946100  |
| H | -5.01668500 | 5.33738800  | -0.81898500 |
| H | -3.21930800 | 4.40683000  | -2.26289500 |
| H | -2.08383500 | 2.31077400  | -1.64147400 |
| H | 0.39388800  | 0.60274000  | -1.82550400 |
| H | 1.69892200  | 2.44193900  | -1.74874000 |
| H | 2.66963900  | 4.40367500  | -0.61612400 |
| H | 0.84294300  | 3.16100100  | 3.07440400  |
| H | -0.11301200 | 1.20540400  | 1.95498700  |
| H | -1.73593900 | -0.24426700 | -1.51760600 |

|   |             |             |             |
|---|-------------|-------------|-------------|
| H | 2.22963800  | 4.79479700  | 1.80650700  |
| C | 0.46830300  | -3.71523400 | -0.63635800 |
| C | 0.70675800  | -3.09752200 | -1.90237100 |
| C | -0.48682900 | -2.47364000 | -2.31992200 |
| C | -1.49238200 | -2.73947300 | -1.33293200 |
| C | -0.90581800 | -3.51840400 | -0.30920900 |
| H | 1.19993900  | -4.24990200 | -0.04884700 |
| H | 1.65621100  | -3.07341000 | -2.41644500 |
| H | -0.62397000 | -1.90110500 | -3.22779600 |
| H | -2.51860000 | -2.40658200 | -1.35629200 |
| H | -1.40824800 | -3.86405600 | 0.58348600  |

**Table 24.** Atom coordinates and absolute energy of **TS5** (Energy= -2347.82760621 a.u.)

| Atom | Coordinates (Angstroms) |             |             |
|------|-------------------------|-------------|-------------|
|      | X                       | Y           | Z           |
| Fe   | 0.03547600              | -1.86103300 | -0.14213200 |
| C    | 0.01998900              | -1.54506900 | -1.87294200 |
| O    | 0.07472600              | -1.47383300 | -3.02721000 |
| P    | -2.20999900             | -1.10144100 | 0.27547600  |
| C    | -2.81771300             | -0.39470300 | 1.85460000  |
| C    | -2.32105700             | -0.94075700 | 3.05658700  |
| C    | -2.73286800             | -0.45849200 | 4.29759700  |
| C    | -3.66635300             | 0.57781700  | 4.37663300  |
| C    | -4.17148900             | 1.12926400  | 3.19776100  |
| C    | -3.74842300             | 0.65931800  | 1.95336100  |
| C    | -3.39727300             | -0.53605700 | -1.00036000 |
| C    | -4.78072300             | -0.69087300 | -0.75838700 |
| C    | -5.72099000             | -0.40016300 | -1.74299100 |
| C    | -5.31029900             | 0.03796200  | -3.00550200 |
| C    | -3.94871100             | 0.17824200  | -3.26647200 |
| C    | -3.00354000             | -0.10403100 | -2.27752200 |
| P    | 2.30643200              | 0.56300400  | -0.80458900 |
| C    | 3.71630000              | -0.57272600 | -0.38841400 |
| C    | 4.12648100              | -1.49302500 | -1.36546700 |
| C    | 5.18211900              | -2.37571900 | -1.12292500 |
| C    | 5.85259800              | -2.34270800 | 0.10076800  |
| C    | 5.46730000              | -1.41907600 | 1.07644400  |
| C    | 4.41096200              | -0.53980900 | 0.83215300  |
| C    | 2.91191000              | 2.12478700  | 0.00966500  |
| C    | 3.82516900              | 2.90484000  | -0.72099900 |
| C    | 4.32759700              | 4.09799900  | -0.20381900 |
| C    | 3.91238100              | 4.54591500  | 1.05269200  |

|   |             |             |             |
|---|-------------|-------------|-------------|
| C | 2.99648000  | 3.78996200  | 1.78433800  |
| C | 2.50198800  | 2.58923700  | 1.26777700  |
| C | -0.26626500 | 0.66607300  | 0.49541300  |
| C | -0.78054200 | 1.79003000  | -0.30346300 |
| C | -1.57961400 | 2.74798400  | 0.35861900  |
| C | -2.04842700 | 3.87959500  | -0.30302600 |
| C | -1.73571100 | 4.08630900  | -1.64806500 |
| C | -0.95152500 | 3.14746200  | -2.32146300 |
| C | -0.48115000 | 2.01343000  | -1.66364700 |
| C | 0.98080400  | -0.04096000 | 0.35115000  |
| H | -1.61061300 | -1.76000700 | 3.01485200  |
| H | -2.33342100 | -0.90287500 | 5.20544400  |
| H | -3.99700000 | 0.94754900  | 5.34278800  |
| H | -4.89457400 | 1.93959500  | 3.24302600  |
| H | -4.14528000 | 1.11322400  | 1.05258100  |
| H | -5.12061500 | -1.05322700 | 0.20682300  |
| H | -6.77831600 | -0.52829200 | -1.52688400 |
| H | -6.04402400 | 0.25880300  | -3.77539600 |
| H | -3.61175500 | 0.51441500  | -4.24327500 |
| H | -1.95639000 | 0.02364900  | -2.51009800 |
| H | 3.61545100  | -1.51201800 | -2.32466200 |
| H | 5.48563400  | -3.08095300 | -1.89186800 |
| H | 6.67752500  | -3.02371700 | 0.29016700  |
| H | 5.99484000  | -1.37912300 | 2.02574200  |
| H | 4.13276900  | 0.18664600  | 1.59048300  |
| H | 4.14189900  | 2.57369600  | -1.70733800 |
| H | 5.03536000  | 4.68310000  | -0.78479300 |
| H | 4.29521100  | 5.47988700  | 1.45440600  |
| H | 2.66394300  | 4.13317500  | 2.76048500  |
| H | 1.78966600  | 2.01581700  | 1.85237900  |
| H | -0.63837500 | 0.68783500  | 1.51444500  |
| H | -1.81720400 | 2.60393500  | 1.40758600  |
| H | -2.65274100 | 4.60449000  | 0.23495700  |
| H | -0.70121400 | 3.29765300  | -3.36775200 |
| H | 0.13148700  | 1.30417700  | -2.20634700 |
| H | 1.37568800  | -0.32689200 | 1.32808000  |
| H | -2.09659500 | 4.97051800  | -2.16531200 |
| C | -0.07475300 | -4.05926000 | -0.37782600 |
| C | -0.53909700 | -3.75888400 | 0.91707000  |
| C | 0.49462100  | -3.07970600 | 1.62964700  |
| C | 1.62694100  | -2.99574500 | 0.77182700  |
| C | 1.27572000  | -3.56824700 | -0.47681000 |
| H | -0.63774400 | -4.54616100 | -1.16187600 |
| H | -1.54158100 | -3.93853700 | 1.27834100  |

|   |            |             |             |
|---|------------|-------------|-------------|
| H | 0.44819900 | -2.73596500 | 2.65323400  |
| H | 2.57645200 | -2.54151200 | 1.00836300  |
| H | 1.92961500 | -3.65607300 | -1.33278300 |

**Table 25.** Atom coordinates and absolute energy of **Int9** (Energy= -2347.84363415 a.u.)

| Atom | Coordinates (Angstroms) |             |             |
|------|-------------------------|-------------|-------------|
|      | X                       | Y           | Z           |
| Fe   | 1.39981500              | -1.96283300 | 0.64435300  |
| C    | 2.22406200              | -2.38432900 | -0.87412300 |
| O    | 2.83995900              | -2.78930000 | -1.76320200 |
| P    | -1.98583900             | -0.34298100 | 1.25969400  |
| C    | -1.80482300             | 1.38644300  | 1.89920500  |
| C    | -2.07456000             | 1.57057000  | 3.26656900  |
| C    | -1.98483800             | 2.83252600  | 3.85550000  |
| C    | -1.60347300             | 3.93506400  | 3.08859800  |
| C    | -1.31704400             | 3.76658300  | 1.73271300  |
| C    | -1.41954400             | 2.50517500  | 1.14178100  |
| C    | -3.67933400             | -0.30596100 | 0.49667800  |
| C    | -4.27079800             | 0.83516300  | -0.06914400 |
| C    | -5.54529500             | 0.77177700  | -0.63388300 |
| C    | -6.25101400             | -0.43366300 | -0.64562700 |
| C    | -5.67740300             | -1.57501700 | -0.08423800 |
| C    | -4.40537100             | -1.50808300 | 0.48732700  |
| P    | 1.55089400              | 0.48024500  | -1.45746300 |
| C    | 3.16245200              | 0.98828500  | -0.68621100 |
| C    | 4.33656000              | 0.68268600  | -1.39242400 |
| C    | 5.59465100              | 1.01319000  | -0.88173600 |
| C    | 5.70126100              | 1.65828900  | 0.35107200  |
| C    | 4.54340200              | 1.97344600  | 1.06733400  |
| C    | 3.28893600              | 1.64048900  | 0.55297200  |
| C    | 0.79157500              | 2.13358300  | -1.89478700 |
| C    | 1.17875100              | 3.38969400  | -1.39713800 |
| C    | 0.54348100              | 4.55951500  | -1.82021000 |
| C    | -0.50059900             | 4.50232600  | -2.74629600 |
| C    | -0.89168400             | 3.26599300  | -3.26236700 |
| C    | -0.24157200             | 2.10076100  | -2.85083900 |
| C    | -0.90136600             | -0.35200100 | -0.31812000 |
| C    | -1.12365600             | -1.67177600 | -1.01996800 |
| C    | -1.73996200             | -1.78890200 | -2.26990100 |
| C    | -1.85718900             | -3.03528200 | -2.88999500 |
| C    | -1.36312900             | -4.18833800 | -2.27369700 |
| C    | -0.75671300             | -4.09093100 | -1.02142400 |

|   |             |             |             |
|---|-------------|-------------|-------------|
| C | -0.64860000 | -2.84150100 | -0.40491400 |
| C | 0.59939000  | -0.15825400 | 0.02636200  |
| H | -2.35760800 | 0.71418000  | 3.87379200  |
| H | -2.20448300 | 2.95236200  | 4.91285900  |
| H | -1.52458600 | 4.91749700  | 3.54581400  |
| H | -1.01071900 | 4.61391600  | 1.12591700  |
| H | -1.18651300 | 2.40432500  | 0.08780900  |
| H | -3.74024900 | 1.78233100  | -0.05890600 |
| H | -5.98912000 | 1.66616000  | -1.06303800 |
| H | -7.24410500 | -0.48030800 | -1.08387500 |
| H | -6.22140800 | -2.51558500 | -0.08328300 |
| H | -3.96997300 | -2.39786800 | 0.93435700  |
| H | 4.26006200  | 0.17205500  | -2.34856800 |
| H | 6.48923200  | 0.76484400  | -1.44633500 |
| H | 6.67783200  | 1.91582600  | 0.75163500  |
| H | 4.61779000  | 2.47991200  | 2.02619100  |
| H | 2.40037300  | 1.89726300  | 1.12237500  |
| H | 1.99190100  | 3.46184800  | -0.68315800 |
| H | 0.86988400  | 5.51964500  | -1.42834400 |
| H | -0.99382400 | 5.41358000  | -3.07294300 |
| H | -1.68978500 | 3.20912500  | -3.99783700 |
| H | -0.52383600 | 1.14817000  | -3.29300700 |
| H | -1.28125700 | 0.45155000  | -0.96301600 |
| H | -2.12459400 | -0.89996000 | -2.76111700 |
| H | -2.33446600 | -3.10608600 | -3.86342100 |
| H | -0.37586500 | -4.97736100 | -0.52253500 |
| H | -0.34694200 | -2.79308500 | 0.65780400  |
| H | 0.67832900  | 0.55900900  | 0.84862500  |
| H | -1.45354400 | -5.15266500 | -2.76442300 |
| C | 1.56223900  | -3.33463600 | 2.34278600  |
| C | 1.06170700  | -2.06353400 | 2.78679300  |
| C | 2.05269300  | -1.09209000 | 2.50095300  |
| C | 3.13965500  | -1.73084500 | 1.84245500  |
| C | 2.83982200  | -3.13736800 | 1.77969600  |
| H | 1.03602900  | -4.27885500 | 2.40069400  |
| H | 0.10310200  | -1.88214100 | 3.25113700  |
| H | 1.97227400  | -0.03251300 | 2.69087700  |
| H | 4.04369600  | -1.25196300 | 1.49556500  |
| H | 3.46565200  | -3.90039200 | 1.33683400  |

**Table 26.** Atom coordinates and absolute energy of **Int9** (Energy= -2347.88049385 a.u.)

---

| Atom | Coordinates (Angstroms) |   |   |
|------|-------------------------|---|---|
|      | X                       | Y | Z |

---



---

|    |             |             |             |
|----|-------------|-------------|-------------|
| Fe | -0.23302400 | -1.77570800 | -0.53392700 |
| C  | -0.15000500 | -1.17186800 | -2.16677500 |
| O  | -0.08636900 | -0.87495800 | -3.28848500 |
| P  | -1.78131700 | -0.35322100 | 0.19275000  |
| C  | -2.61789200 | -0.68887400 | 1.80551700  |
| C  | -3.99137700 | -0.97382000 | 1.86662200  |
| C  | -4.60053800 | -1.29147500 | 3.08244200  |
| C  | -3.85021000 | -1.32951400 | 4.25765000  |
| C  | -2.48196100 | -1.05436200 | 4.20935900  |
| C  | -1.87045200 | -0.74416300 | 2.99483200  |
| C  | -3.13368600 | 0.32986800  | -0.84461900 |
| C  | -3.81794100 | 1.50636900  | -0.49330200 |
| C  | -4.83989500 | 1.99438600  | -1.30498300 |
| C  | -5.19670100 | 1.31148000  | -2.47158800 |
| C  | -4.52682700 | 0.14069400  | -2.82589300 |
| C  | -3.49676700 | -0.34626100 | -2.01784300 |
| P  | 2.20630200  | 0.56730300  | -0.66039600 |
| C  | 3.44440400  | -0.81777500 | -0.55819000 |
| C  | 3.68635400  | -1.55747400 | -1.72732400 |
| C  | 4.61274600  | -2.60289900 | -1.74062400 |
| C  | 5.32613200  | -2.91956700 | -0.58300700 |
| C  | 5.11007800  | -2.18168400 | 0.58346000  |
| C  | 4.17960500  | -1.14012300 | 0.59419600  |
| C  | 2.98444500  | 1.78479300  | 0.52106700  |
| C  | 3.89830800  | 2.70688800  | -0.01738500 |
| C  | 4.51781500  | 3.66379400  | 0.78623700  |
| C  | 4.22274300  | 3.73050600  | 2.14992700  |
| C  | 3.30900200  | 2.83096800  | 2.70013700  |
| C  | 2.69816100  | 1.86812600  | 1.89244300  |
| C  | -0.40922300 | 0.89086100  | 0.54579900  |
| C  | -0.50140800 | 2.21811700  | -0.17867700 |
| C  | -0.66226900 | 3.38849500  | 0.58102400  |
| C  | -0.78187900 | 4.63874700  | -0.02648800 |
| C  | -0.74139700 | 4.74498500  | -1.41681800 |
| C  | -0.58113600 | 3.59187600  | -2.18673700 |
| C  | -0.46496800 | 2.34240600  | -1.57751100 |
| C  | 0.76119000  | -0.12924100 | 0.27543600  |
| H  | -4.59301700 | -0.93775700 | 0.96450200  |
| H  | -5.66538300 | -1.50513300 | 3.10791600  |
| H  | -4.32568400 | -1.57279400 | 5.20329700  |
| H  | -1.88746500 | -1.08270800 | 5.11820200  |
| H  | -0.80217900 | -0.55041100 | 2.97852700  |
| H  | -3.54554900 | 2.04503500  | 0.40881800  |

---

|   |             |             |             |
|---|-------------|-------------|-------------|
| H | -5.35640800 | 2.90934700  | -1.02970000 |
| H | -5.99359900 | 1.69480800  | -3.10255700 |
| H | -4.79966800 | -0.39236000 | -3.73203900 |
| H | -2.96855300 | -1.25252100 | -2.29746100 |
| H | 3.14462000  | -1.30454100 | -2.63509800 |
| H | 4.78628400  | -3.16051200 | -2.65734500 |
| H | 6.05391200  | -3.72624700 | -0.59228200 |
| H | 5.67175800  | -2.41292100 | 1.48492500  |
| H | 4.03572300  | -0.56352800 | 1.50326700  |
| H | 4.11997100  | 2.67530800  | -1.08149300 |
| H | 5.22376100  | 4.36368400  | 0.34699900  |
| H | 4.69711900  | 4.48066100  | 2.77665000  |
| H | 3.07116400  | 2.87695000  | 3.76001200  |
| H | 1.99324700  | 1.17345800  | 2.34043000  |
| H | -0.45173900 | 1.12499700  | 1.61435200  |
| H | -0.68250800 | 3.31892900  | 1.66599500  |
| H | -0.89929300 | 5.52716900  | 0.58790500  |
| H | -0.54546400 | 3.66075400  | -3.27026200 |
| H | -0.33989600 | 1.46609100  | -2.20015900 |
| H | 1.09671200  | -0.50254600 | 1.25042000  |
| H | -0.83047800 | 5.71601300  | -1.89570900 |
| C | -0.57484900 | -3.84782400 | -1.11749600 |
| C | -1.18154200 | -3.61330700 | 0.13582500  |
| C | -0.16319500 | -3.21938000 | 1.06392800  |
| C | 1.08016000  | -3.23409700 | 0.37257500  |
| C | 0.83491800  | -3.59663100 | -0.97555000 |
| H | -1.08047800 | -4.14225900 | -2.02708800 |
| H | -2.23909200 | -3.68237700 | 0.35236100  |
| H | -0.31745300 | -2.98583500 | 2.10716600  |
| H | 2.04220500  | -2.95881700 | 0.77885300  |
| H | 1.58257800  | -3.68120500 | -1.75074500 |

**Table 27.** Atom coordinates and absolute energy of **Int10** (Energy= -3152.86166668 a.u.)

| Atom | Coordinates (Angstroms) |             |             |
|------|-------------------------|-------------|-------------|
|      | X                       | Y           | Z           |
| Fe   | -1.21774600             | 0.07728700  | -1.53537700 |
| P    | -2.55615700             | -0.74838800 | 0.11022800  |
| H    | -1.95607000             | -0.98239900 | 1.36069600  |
| C    | -3.29854800             | -2.41433300 | -0.17852600 |
| C    | -3.66500000             | -2.81952800 | -1.46967000 |
| C    | -3.53066700             | -3.28704400 | 0.89673100  |
| C    | -4.26177500             | -4.06414700 | -1.68180900 |

|   |             |             |             |
|---|-------------|-------------|-------------|
| H | -3.47239200 | -2.16342100 | -2.31278600 |
| C | -4.11795000 | -4.53410600 | 0.68329900  |
| H | -3.24764800 | -2.99269100 | 1.90330900  |
| C | -4.48748600 | -4.92372300 | -0.60640300 |
| H | -4.53966400 | -4.36452300 | -2.68802000 |
| H | -4.28687900 | -5.20131900 | 1.52377500  |
| H | -4.94414000 | -5.89526500 | -0.77191300 |
| C | -4.04317900 | 0.21454800  | 0.65696900  |
| C | -5.26907900 | 0.08804600  | -0.01406200 |
| C | -3.95901000 | 1.08873300  | 1.75129400  |
| C | -6.38010800 | 0.83145700  | 0.38760200  |
| H | -5.37086400 | -0.61439300 | -0.83622900 |
| C | -5.07389600 | 1.82580400  | 2.15495100  |
| H | -3.01463400 | 1.19664300  | 2.27471100  |
| C | -6.28528900 | 1.70498800  | 1.47197000  |
| H | -7.32200100 | 0.71823600  | -0.14181900 |
| H | -4.99456200 | 2.49231700  | 3.00949100  |
| H | -7.15120700 | 2.27984300  | 1.78757800  |
| C | -0.68333000 | -1.50568200 | -2.06211600 |
| O | -0.48417200 | -2.53281200 | -2.56125300 |
| P | 2.45251100  | -1.20915700 | -1.30247000 |
| C | 3.18876300  | 0.31394900  | -2.07322900 |
| C | 3.21898200  | 0.35243200  | -3.47685900 |
| C | 3.74654500  | 1.45087200  | -4.16095700 |
| C | 4.25044200  | 2.54012800  | -3.44959900 |
| C | 4.22869500  | 2.52121000  | -2.05258600 |
| C | 3.70363500  | 1.41981600  | -1.37323800 |
| C | 3.93393400  | -2.01968700 | -0.52184200 |
| C | 5.19040400  | -1.42065500 | -0.33878900 |
| C | 6.25170700  | -2.13600200 | 0.22044400  |
| C | 6.07847200  | -3.46379400 | 0.61183800  |
| C | 4.83758700  | -4.07691300 | 0.42893900  |
| C | 3.78273900  | -3.36610900 | -0.14244800 |
| P | -0.26889800 | 1.50759300  | 1.22416400  |
| C | -0.25976100 | 3.28202600  | 0.64573600  |
| C | -1.30655300 | 4.10014900  | 1.10202800  |
| C | -1.35525700 | 5.46100100  | 0.78879100  |
| C | -0.35428800 | 6.03412300  | 0.00448700  |
| C | 0.69301300  | 5.23653600  | -0.46245300 |
| C | 0.73859300  | 3.87780100  | -0.14481900 |
| C | 1.03718900  | 1.66682300  | 2.56179800  |
| C | 2.29862600  | 2.26740100  | 2.41217800  |
| C | 3.18922400  | 2.35139600  | 3.48341900  |
| C | 2.83059900  | 1.84618700  | 4.73618900  |

|   |             |             |             |
|---|-------------|-------------|-------------|
| C | 1.57657000  | 1.26014000  | 4.90796200  |
| C | 0.69371500  | 1.17093800  | 3.82902900  |
| C | 1.54023400  | -0.48274100 | 0.22439800  |
| C | 1.20480600  | -1.61266400 | 1.19086500  |
| C | 1.88347400  | -1.67668600 | 2.42016300  |
| C | 1.65656800  | -2.70971500 | 3.32944900  |
| C | 0.74489200  | -3.72244700 | 3.02953500  |
| C | 0.07432300  | -3.68962500 | 1.80651800  |
| C | 0.30498600  | -2.65151800 | 0.90055200  |
| C | 0.42721400  | 0.51417000  | -0.22917400 |
| H | 2.82450200  | -0.49213500 | -4.03621300 |
| H | 3.76247300  | 1.45462100  | -5.24741700 |
| H | 4.65926000  | 3.39700500  | -3.97765000 |
| H | 4.62630600  | 3.36269500  | -1.49109100 |
| H | 3.70451000  | 1.42159400  | -0.28717700 |
| H | 5.35417700  | -0.39298600 | -0.64412200 |
| H | 7.21633000  | -1.65168700 | 0.34864100  |
| H | 6.90502900  | -4.01873700 | 1.04710100  |
| H | 4.69178300  | -5.11306100 | 0.72183800  |
| H | 2.82752800  | -3.86018800 | -0.29420300 |
| H | -2.09460100 | 3.66293500  | 1.70918900  |
| H | -2.17720500 | 6.07014400  | 1.15521100  |
| H | -0.38964900 | 7.09114300  | -0.24382000 |
| H | 1.47744200  | 5.67228300  | -1.07576600 |
| H | 1.55989400  | 3.27999600  | -0.52995400 |
| H | 2.58476900  | 2.69410400  | 1.45622000  |
| H | 4.16052300  | 2.81870500  | 3.34335000  |
| H | 3.52195000  | 1.91637600  | 5.57141000  |
| H | 1.28450700  | 0.87055300  | 5.87948600  |
| H | -0.27832000 | 0.70562800  | 3.96857400  |
| H | 2.30239300  | 0.10890100  | 0.74596600  |
| H | 2.60185200  | -0.90199800 | 2.66835600  |
| H | 2.19802100  | -2.72205400 | 4.27144500  |
| H | -0.62852000 | -4.47597400 | 1.54519900  |
| H | -0.20712300 | -2.67569700 | -0.05059500 |
| H | 0.95715200  | 1.22244700  | -0.86953500 |
| H | 0.56718900  | -4.53079300 | 3.73355700  |
| C | -2.05957300 | 0.35040000  | -3.53086600 |
| C | -0.79408500 | 1.02545600  | -3.45187700 |
| C | -0.92027000 | 2.05219800  | -2.48327600 |
| C | -2.21889600 | 1.99483900  | -1.91925400 |
| C | -2.92745700 | 0.94147200  | -2.58548300 |
| H | -2.29711300 | -0.47797400 | -4.18504000 |
| H | 0.08738300  | 0.80805600  | -4.03806100 |

|   |             |            |             |
|---|-------------|------------|-------------|
| H | -0.14167400 | 2.73744300 | -2.19066800 |
| H | -2.61254200 | 2.64506300 | -1.15264600 |
| H | -3.95207700 | 0.65537800 | -2.39618100 |

**Table 28.** Atom coordinates and absolute energy of **TS6** (Energy= -3152.79511325 a.u.)

| Atom | Coordinates (Angstroms) |             |             |
|------|-------------------------|-------------|-------------|
|      | X                       | Y           | Z           |
| Fe   | -1.39463800             | 0.41516700  | -1.70687200 |
| P    | -2.70377800             | -0.46497200 | -0.05123100 |
| H    | -1.19342700             | -0.18482500 | 0.26627700  |
| C    | -3.43876500             | -2.14097200 | -0.20396700 |
| C    | -3.75714000             | -2.70127100 | -1.45101600 |
| C    | -3.72993300             | -2.87611500 | 0.95946200  |
| C    | -4.34377400             | -3.96641000 | -1.53492800 |
| H    | -3.54854300             | -2.14476200 | -2.35825500 |
| C    | -4.32192000             | -4.13556900 | 0.87477500  |
| H    | -3.48660600             | -2.45811200 | 1.93150000  |
| C    | -4.62724500             | -4.68535100 | -0.37352400 |
| H    | -4.58138100             | -4.38622200 | -2.50834100 |
| H    | -4.54080200             | -4.69032600 | 1.78293100  |
| H    | -5.08393600             | -5.66888500 | -0.43877800 |
| C    | -4.08151700             | 0.56862400  | 0.59230800  |
| C    | -5.40095900             | 0.31159900  | 0.17560200  |
| C    | -3.85357500             | 1.63086600  | 1.48225200  |
| C    | -6.45909600             | 1.09637900  | 0.63541500  |
| H    | -5.60506200             | -0.51132500 | -0.50280700 |
| C    | -4.91517000             | 2.41741800  | 1.93225600  |
| H    | -2.84185000             | 1.82957900  | 1.82298800  |
| C    | -6.22082500             | 2.15551000  | 1.51326200  |
| H    | -7.47098900             | 0.87838100  | 0.30450600  |
| H    | -4.71964700             | 3.23212500  | 2.62465700  |
| H    | -7.04496600             | 2.76643900  | 1.87050100  |
| C    | -0.96460300             | -1.15401400 | -2.38439500 |
| O    | -0.80282700             | -2.13865100 | -2.97033500 |
| P    | 2.19596400              | -1.15179000 | -1.35094600 |
| C    | 3.28378100              | 0.29175100  | -1.78689500 |
| C    | 3.36776200              | 0.61695700  | -3.15157000 |
| C    | 4.17438700              | 1.66570100  | -3.59902500 |
| C    | 4.91394500              | 2.41670300  | -2.68445800 |
| C    | 4.84157400              | 2.11183400  | -1.32309600 |
| C    | 4.03341000              | 1.06205100  | -0.87997600 |
| C    | 3.42756400              | -2.43215100 | -0.80224300 |

|   |             |             |             |
|---|-------------|-------------|-------------|
| C | 4.74474600  | -2.18253400 | -0.38625100 |
| C | 5.59301500  | -3.23134000 | -0.02575300 |
| C | 5.14100600  | -4.55082000 | -0.07156700 |
| C | 3.83721600  | -4.81659300 | -0.49258900 |
| C | 2.99520900  | -3.76895000 | -0.86470800 |
| P | -0.11210600 | 1.70592500  | 1.40258700  |
| C | 0.42942800  | 3.37442600  | 0.78150900  |
| C | -0.31293400 | 4.47733600  | 1.23719100  |
| C | 0.01870300  | 5.77970100  | 0.85744100  |
| C | 1.09826300  | 6.00534700  | 0.00217500  |
| C | 1.84406800  | 4.92106500  | -0.46512600 |
| C | 1.51224400  | 3.62051000  | -0.07882900 |
| C | 1.11839200  | 1.43142500  | 2.77380000  |
| C | 2.44441300  | 1.89595300  | 2.78110900  |
| C | 3.27632700  | 1.67038000  | 3.87937000  |
| C | 2.79607700  | 0.98063000  | 4.99553700  |
| C | 1.47792100  | 0.52295000  | 5.00824300  |
| C | 0.64859500  | 0.75035100  | 3.90846800  |
| C | 1.39339400  | -0.57334600 | 0.29556900  |
| C | 0.99982200  | -1.79079600 | 1.11708300  |
| C | 1.70435400  | -2.08683900 | 2.29459600  |
| C | 1.41248200  | -3.22388500 | 3.04773200  |
| C | 0.40709000  | -4.09967400 | 2.63580400  |
| C | -0.29630800 | -3.82705500 | 1.46204500  |
| C | 0.00059400  | -2.68788900 | 0.71153500  |
| C | 0.30583100  | 0.49929700  | -0.01010000 |
| H | 2.79538800  | 0.03408400  | -3.86857600 |
| H | 4.22444500  | 1.89490800  | -4.65990500 |
| H | 5.54361300  | 3.23250500  | -3.02831200 |
| H | 5.41598700  | 2.69056500  | -0.60465800 |
| H | 3.99152900  | 0.84537300  | 0.18343700  |
| H | 5.12416900  | -1.16723800 | -0.35518700 |
| H | 6.61007400  | -3.01466200 | 0.29039800  |
| H | 5.80241000  | -5.36561800 | 0.20984500  |
| H | 3.47680600  | -5.84039600 | -0.54135100 |
| H | 1.98769700  | -3.98856600 | -1.20512300 |
| H | -1.16052000 | 4.31022700  | 1.89706100  |
| H | -0.57085100 | 6.61571400  | 1.22376600  |
| H | 1.35473500  | 7.01674900  | -0.30031200 |
| H | 2.68838800  | 5.08245700  | -1.13004200 |
| H | 2.10770500  | 2.79533200  | -0.45472500 |
| H | 2.82639800  | 2.45589500  | 1.93333700  |
| H | 4.29810900  | 2.04071700  | 3.86714000  |
| H | 3.44275000  | 0.81071500  | 5.85190600  |

|   |             |             |             |
|---|-------------|-------------|-------------|
| H | 1.09230400  | -0.00712100 | 5.87469300  |
| H | -0.37907700 | 0.39800600  | 3.92769000  |
| H | 2.19349800  | -0.08230300 | 0.86079200  |
| H | 2.48949100  | -1.41396000 | 2.62629300  |
| H | 1.97363700  | -3.42423200 | 3.95646200  |
| H | -1.08045900 | -4.49808900 | 1.12432000  |
| H | -0.54382900 | -2.50993800 | -0.20727800 |
| H | 0.70380900  | 1.13288200  | -0.80604400 |
| H | 0.17770700  | -4.98671200 | 3.21991400  |
| C | -2.31363100 | 1.02676600  | -3.55423900 |
| C | -0.95081900 | 1.49161700  | -3.55826100 |
| C | -0.80108800 | 2.38968800  | -2.47901100 |
| C | -2.04212100 | 2.47610500  | -1.77951700 |
| C | -2.97904100 | 1.64914200  | -2.46981500 |
| H | -2.75181600 | 0.33205700  | -4.25748800 |
| H | -0.17978400 | 1.20085400  | -4.25817500 |
| H | 0.11196400  | 2.89445600  | -2.19940600 |
| H | -2.24648600 | 3.08563000  | -0.91184400 |
| H | -4.00746300 | 1.48602600  | -2.18066200 |

**Table 29.** Atom coordinates and absolute energy of **1a** (Energy= -1918.28405363 a.u.)

---

| Atom | Coordinates (Angstroms) |             |             |
|------|-------------------------|-------------|-------------|
|      | X                       | Y           | Z           |
| H    | -0.86705500             | -1.00249200 | -1.83018400 |
| P    | 1.79892600              | 0.41035700  | -1.42637900 |
| C    | 1.25446200              | 2.15764600  | -1.11491600 |
| C    | 1.54436300              | 3.08635000  | -2.12900000 |
| C    | 1.18577000              | 4.42833500  | -2.00146200 |
| C    | 0.50896300              | 4.86525300  | -0.86169300 |
| C    | 0.19925100              | 3.95353400  | 0.14817700  |
| C    | 0.57204400              | 2.61353300  | 0.02540500  |
| C    | 3.39002100              | 0.31914800  | -0.47348900 |
| C    | 3.71336900              | 1.14391700  | 0.61498600  |
| C    | 4.93856800              | 1.01148900  | 1.26952600  |
| C    | 5.86043500              | 0.05118400  | 0.84883400  |
| C    | 5.55326700              | -0.77324200 | -0.23402600 |
| C    | 4.33166000              | -0.63440100 | -0.89335900 |
| P    | -2.08640100             | -1.31113900 | 0.25945000  |
| C    | -3.66505000             | -0.90937800 | -0.62634000 |
| C    | -4.85212800             | -1.40312200 | -0.05511000 |
| C    | -6.08675600             | -1.19040600 | -0.66382100 |
| C    | -6.16091300             | -0.49411200 | -1.87275400 |

---

|   |             |             |             |
|---|-------------|-------------|-------------|
| C | -4.99269600 | -0.01121700 | -2.45995600 |
| C | -3.75569100 | -0.21351300 | -1.84155700 |
| C | -2.12211400 | -0.07976300 | 1.65377000  |
| C | -2.72010300 | 1.18786000  | 1.56547200  |
| C | -2.69008600 | 2.06646800  | 2.64867200  |
| C | -2.05746600 | 1.69504500  | 3.83813900  |
| C | -1.46180200 | 0.43796400  | 3.94127500  |
| C | -1.50124300 | -0.44445500 | 2.85896800  |
| C | 0.63180900  | -0.60682300 | -0.30269500 |
| C | 1.15211600  | -2.02978000 | -0.20637300 |
| C | 1.68505400  | -2.50724200 | 0.99870500  |
| C | 2.17996500  | -3.80733100 | 1.10264500  |
| C | 2.15593900  | -4.65662200 | -0.00359400 |
| C | 1.63714200  | -4.19232000 | -1.21345000 |
| C | 1.14325400  | -2.89204900 | -1.31398400 |
| C | -0.80476900 | -0.49974200 | -0.85919600 |
| H | 2.05364600  | 2.74987200  | -3.02842000 |
| H | 1.42557400  | 5.12930700  | -2.79595600 |
| H | 0.21929500  | 5.90759300  | -0.76416900 |
| H | -0.33523900 | 4.28008200  | 1.03569900  |
| H | 0.31663100  | 1.92869400  | 0.82731500  |
| H | 3.01179100  | 1.90275100  | 0.94664800  |
| H | 5.17387800  | 1.66139800  | 2.10795500  |
| H | 6.81462600  | -0.04911900 | 1.35831300  |
| H | 6.26657400  | -1.51988900 | -0.57132400 |
| H | 4.10352900  | -1.27353800 | -1.74153200 |
| H | -4.80473500 | -1.96212000 | 0.87625100  |
| H | -6.99042900 | -1.57609400 | -0.20036600 |
| H | -7.12137200 | -0.33499600 | -2.35428700 |
| H | -5.03925300 | 0.52874700  | -3.40163600 |
| H | -2.86439500 | 0.17865800  | -2.31957200 |
| H | -3.22118000 | 1.48398800  | 0.64865200  |
| H | -3.16454300 | 3.04061700  | 2.56635800  |
| H | -2.03692800 | 2.37962900  | 4.68131700  |
| H | -0.97575300 | 0.13871800  | 4.86561800  |
| H | -1.05235600 | -1.43012500 | 2.94988400  |
| H | 0.65902600  | -0.17192500 | 0.70221000  |
| H | 1.71456700  | -1.84969000 | 1.86334100  |
| H | 2.58453800  | -4.15511900 | 2.04892200  |
| H | 1.61626200  | -4.84365300 | -2.08266600 |
| H | 0.75130500  | -2.54413000 | -2.26534400 |
| H | -1.06389100 | 0.55148200  | -1.02095900 |
| H | 2.53819100  | -5.67016900 | 0.07505500  |



**Table 30.** Atom coordinates and absolute energy of **Int4**<sup>+</sup> (Energy= -1542.82825101 a.u.)

| Atom | Coordinates (Angstroms) |             |             |
|------|-------------------------|-------------|-------------|
|      | X                       | Y           | Z           |
| Fe   | 0.17273600              | -1.32151600 | -0.87296300 |
| P    | -0.47358300             | 0.39544400  | 0.70324100  |
| C    | -0.51741700             | 2.09277000  | -0.04762200 |
| C    | 0.45368800              | 2.52627300  | -0.96824300 |
| C    | -1.43306900             | 3.05044200  | 0.43273800  |
| C    | 0.49853100              | 3.85228000  | -1.40112800 |
| H    | 1.17806800              | 1.81933000  | -1.35469400 |
| C    | -1.38753400             | 4.37476000  | -0.00113600 |
| H    | -2.19013500             | 2.75888200  | 1.15374400  |
| C    | -0.42254500             | 4.78467900  | -0.92328600 |
| H    | 1.25672400              | 4.15440000  | -2.11920800 |
| H    | -2.11102100             | 5.08858100  | 0.38432800  |
| H    | -0.38872800             | 5.81612100  | -1.26254500 |
| C    | -2.28983600             | 0.08419600  | 0.98097200  |
| C    | -2.65743600             | -0.50168400 | 2.20501500  |
| C    | -3.31433200             | 0.37628100  | 0.06053400  |
| C    | -3.99047700             | -0.80443900 | 2.49592200  |
| H    | -1.88848800             | -0.70671700 | 2.94636500  |
| C    | -4.64645300             | 0.08084300  | 0.35004900  |
| H    | -3.07006800             | 0.84754300  | -0.88585300 |
| C    | -4.99003700             | -0.51617600 | 1.56695700  |
| H    | -4.24621000             | -1.25484300 | 3.45131700  |
| H    | -5.41955100             | 0.31766000  | -0.37637000 |
| H    | -6.02831100             | -0.74524600 | 1.79007000  |
| C    | -0.73185400             | -0.33835300 | -2.01172800 |
| O    | -1.32871500             | 0.23908300  | -2.81587500 |
| C    | 0.88914200              | -3.13014900 | 0.13633300  |
| C    | -0.38134500             | -2.75801200 | 0.64327300  |
| C    | -1.31236000             | -2.76679400 | -0.43646700 |
| C    | -0.61068500             | -3.19038900 | -1.61155500 |
| C    | 0.74402000              | -3.39882200 | -1.25952600 |
| H    | 1.80948500              | -3.18485500 | 0.69966700  |
| H    | -0.60397700             | -2.47640900 | 1.66199800  |
| H    | -2.36137000             | -2.51756500 | -0.37012300 |
| H    | -1.03391000             | -3.29310100 | -2.60161300 |
| H    | 1.54265800              | -3.66332100 | -1.93803400 |
| C    | 2.11185600              | -0.51156700 | -0.75528000 |
| C    | 3.07375600              | -0.14894900 | 0.26327900  |
| C    | 2.85494700              | -0.38554100 | 1.63064400  |

|   |            |             |             |
|---|------------|-------------|-------------|
| C | 4.29239100 | 0.43858600  | -0.13701900 |
| C | 3.82981800 | -0.05122500 | 2.56980900  |
| H | 1.90838000 | -0.80630100 | 1.94593800  |
| C | 5.26091500 | 0.76981600  | 0.80501400  |
| H | 4.46613200 | 0.62803600  | -1.19181900 |
| C | 5.03384700 | 0.52486600  | 2.16284900  |
| H | 3.64413400 | -0.23632900 | 3.62386000  |
| H | 6.19426900 | 1.22119300  | 0.48082500  |
| H | 5.79013700 | 0.78635400  | 2.89728600  |
| C | 1.78635700 | -0.68221300 | -1.95687800 |
| H | 1.93078500 | -0.66719100 | -3.02083500 |

**Table 31.** Atom coordinates and absolute energy of **TS3'** (Energy= -1542.79012337 a.u.)

| Atom | Coordinates (Angstroms) |             |             |
|------|-------------------------|-------------|-------------|
|      | X                       | Y           | Z           |
| Fe   | -1.08657000             | -1.47203900 | -0.84972200 |
| P    | -0.15003600             | 0.36698600  | 0.25347600  |
| C    | 0.50255300              | 1.73704000  | -0.79974300 |
| C    | 1.14170600              | 1.47325100  | -2.02874400 |
| C    | 0.52792200              | 3.06737300  | -0.33311100 |
| C    | 1.75932600              | 2.48839300  | -2.75992800 |
| H    | 1.15521500              | 0.46176000  | -2.41922000 |
| C    | 1.13991700              | 4.08262500  | -1.06774000 |
| H    | 0.06254400              | 3.31192600  | 0.61611100  |
| C    | 1.75981500              | 3.80224500  | -2.28697500 |
| H    | 2.23127900              | 2.25095200  | -3.71009400 |
| H    | 1.13312400              | 5.09882800  | -0.68153600 |
| H    | 2.23409700              | 4.59408500  | -2.85970400 |
| C    | -1.42417700             | 1.23562800  | 1.28135700  |
| C    | -1.39902000             | 1.08188900  | 2.67694300  |
| C    | -2.46601200             | 1.99674100  | 0.71776200  |
| C    | -2.38234200             | 1.65957900  | 3.48548700  |
| H    | -0.59364000             | 0.51157300  | 3.13324500  |
| C    | -3.44334900             | 2.58114300  | 1.52316000  |
| H    | -2.50521400             | 2.13100000  | -0.35961400 |
| C    | -3.40702100             | 2.41136100  | 2.91096500  |
| H    | -2.34159300             | 1.52756800  | 4.56354500  |
| H    | -4.23747100             | 3.16745400  | 1.06803100  |
| H    | -4.17068500             | 2.86467700  | 3.53680900  |
| C    | -1.27040500             | -0.65641600 | -2.37940300 |
| O    | -1.46703300             | -0.14839100 | -3.40277800 |
| C    | -2.97643500             | -1.59881000 | 0.17752300  |

|   |             |             |             |
|---|-------------|-------------|-------------|
| C | -3.06717100 | -2.34595700 | -1.02672300 |
| C | -2.10028900 | -3.39246200 | -0.98255500 |
| C | -1.45403500 | -3.32049200 | 0.29137900  |
| C | -1.98370300 | -2.22331000 | 1.00375300  |
| H | -3.55728100 | -0.72522100 | 0.43475700  |
| H | -3.71834800 | -2.12191500 | -1.86126400 |
| H | -1.91687400 | -4.12691000 | -1.75449600 |
| H | -0.65362900 | -3.96529000 | 0.62778900  |
| H | -1.68183100 | -1.89028200 | 1.98644300  |
| C | 1.77105000  | -1.60046000 | -0.34107300 |
| C | 2.88298500  | -1.25727600 | 0.46025300  |
| C | 3.73660800  | -0.19148300 | 0.08596600  |
| C | 3.19808000  | -2.02808600 | 1.60470800  |
| C | 4.86441500  | 0.09268500  | 0.84475900  |
| H | 3.48488300  | 0.40477000  | -0.78423700 |
| C | 4.32928500  | -1.73267200 | 2.35463800  |
| H | 2.54225100  | -2.84539400 | 1.88590100  |
| C | 5.16238800  | -0.67330200 | 1.97772300  |
| H | 5.51445100  | 0.91340300  | 0.55763600  |
| H | 4.56666600  | -2.32551500 | 3.23273700  |
| H | 6.04575300  | -0.44536100 | 2.56712900  |
| C | 0.86966800  | -2.03544800 | -1.11587100 |
| H | 1.01337200  | -2.75942700 | -1.91418500 |

**Table 32.** Atom coordinates and absolute energy of **Int5-2** (Energy= -1542.81706576 a.u.)

---

| Atom | Coordinates (Angstroms) |             |             |
|------|-------------------------|-------------|-------------|
|      | X                       | Y           | Z           |
| Fe   | -3.06154800             | -0.54683400 | -0.15366800 |
| P    | 0.73468000              | 0.52617700  | -1.05165200 |
| C    | 2.40525000              | -0.21863500 | -1.35310600 |
| C    | 2.46292100              | -1.21228300 | -2.34524100 |
| C    | 3.59264100              | 0.13504300  | -0.69360400 |
| C    | 3.66502600              | -1.84864800 | -2.65555500 |
| H    | 1.55739700              | -1.48445900 | -2.88215100 |
| C    | 4.79884500              | -0.48961300 | -1.01463200 |
| H    | 3.57974800              | 0.90688500  | 0.06841000  |
| C    | 4.83816700              | -1.48601900 | -1.99165000 |
| H    | 3.68691600              | -2.61752700 | -3.42289900 |
| H    | 5.70855600              | -0.20122300 | -0.49483500 |
| H    | 5.77790700              | -1.97257400 | -2.23758900 |
| C    | 1.11426200              | 2.11829000  | -0.17955200 |
| C    | 0.45153800              | 2.50878400  | 0.99508900  |

---

|   |             |             |             |
|---|-------------|-------------|-------------|
| C | 1.96025800  | 3.05262600  | -0.80524100 |
| C | 0.64214400  | 3.78233500  | 1.53726000  |
| H | -0.21277300 | 1.80711200  | 1.49076700  |
| C | 2.15564400  | 4.32099400  | -0.25995900 |
| H | 2.47343000  | 2.78456500  | -1.72495800 |
| C | 1.49682900  | 4.69243500  | 0.91479000  |
| H | 0.12438500  | 4.05959300  | 2.45181200  |
| H | 2.82094700  | 5.02226800  | -0.75639800 |
| H | 1.64680200  | 5.68169500  | 1.33750400  |
| C | -3.01109300 | -1.78786800 | -1.40861100 |
| O | -3.01272600 | -2.55491300 | -2.27106400 |
| C | -3.75093400 | 1.05454800  | 1.07137300  |
| C | -3.41052500 | 1.54648400  | -0.21507200 |
| C | -4.21920500 | 0.86691800  | -1.17067600 |
| C | -5.12203600 | 0.00243900  | -0.45397900 |
| C | -4.81459600 | 0.10140500  | 0.91854800  |
| H | -3.28590600 | 1.33886200  | 2.00511800  |
| H | -2.61392100 | 2.24135400  | -0.44009000 |
| H | -4.19105700 | 1.00861900  | -2.24177700 |
| H | -5.86323000 | -0.64824000 | -0.89699800 |
| H | -5.27798500 | -0.46503400 | 1.71506500  |
| C | 0.02268600  | -0.56421300 | 0.27804500  |
| C | 0.82135000  | -1.30636800 | 1.29655600  |
| C | 1.76723700  | -0.66720500 | 2.11647100  |
| C | 0.62530300  | -2.68882900 | 1.46487500  |
| C | 2.47711600  | -1.38330300 | 3.07962400  |
| H | 1.93219300  | 0.39953300  | 2.01160300  |
| C | 1.33554400  | -3.40406000 | 2.42892700  |
| H | -0.07940900 | -3.20460300 | 0.81882900  |
| C | 2.26503200  | -2.75392900 | 3.24196800  |
| H | 3.19742300  | -0.86645100 | 3.70803300  |
| H | 1.16842100  | -4.47231100 | 2.53696200  |
| H | 2.82201500  | -3.30967900 | 3.99086200  |
| C | -1.30751900 | -0.68296000 | 0.19200100  |
| H | -1.86132700 | -1.37426000 | 0.96949000  |
